# Supplementary material for: Activation of H2 using ansa-aminoboranes: solvent effects, dynamics, and spin hyperpolarization
Source: Royal Society of Chemistry journal article supplement (doi:10.1039/d3cp05816f), 2023-12-22
Supplement: d3cp05816f1.xlsx [file d3cp05816f1.xlsx]

## Sheet: H2_activation
				Eo	Gog	dcm	tol	acn	dmso	Eo'		G(dcm)	G(tol)	G(acn)	G(dmso)
		H2		-1.17609	-1.17748	-1.17583	-1.17563	-1.17565	-1.1752	-1.1766		-1.1747	-1.17451	-1.17452	-1.17408		H2
	PhCAT	a		-1127.69	-1127.21	-1127.71	-1127.71	-1127.71	-1127.7	-1127.77		-1127.31	-1127.31	-1127.31	-1127.3		a	PhCAT
		b		-1127.69	-1127.2	-1127.71	-1127.71	-1127.71	-1127.7	-1127.77		-1127.31	-1127.31	-1127.31	-1127.3		b
		H2-a		-1128.88	-1128.37	-1128.92	-1128.9	-1128.92	-1128.91	-1128.96		-1128.5	-1128.48	-1128.49	-1128.49		H2-a
		H2-b		-1128.88	-1128.37	-1128.92	-1128.91	-1128.92	-1128.91	-1128.96		-1128.49	-1128.48	-1128.49	-1128.49		H2-b
		a-H2-TS		-1128.85	-1128.36	-1128.88	-1128.88	-1128.88	-1128.87	-1128.94		-1128.47	-1128.46	-1128.46	-1128.45		a-H2-TS
		b-H2-TS		-1128.85	-1128.35	-1128.88	-1128.87	-1128.87	-1128.87	-1128.93		-1128.46	-1128.46	-1128.46	-1128.45		b-H2-TS
	MesCAT	a		-1363.57	-1362.93	-1363.59	-1363.59	-1363.59	-1363.58	-1363.67		-1363.05	-1363.05	-1363.05	-1363.04		a	MesCAT
		b		-1363.57	-1362.93	-1363.59	-1363.59	-1363.59	-1363.58	-1363.67		-1363.05	-1363.05	-1363.05	-1363.04		b
		H2-a		-1364.75	-1364.09	-1364.79	-1364.78	-1364.79	-1364.78	-1364.85		-1364.23	-1364.21	-1364.22	-1364.22		H2-a
		H2-b		-1364.76	-1364.09	-1364.79	-1364.78	-1364.79	-1364.78	-1364.86		-1364.23	-1364.22	-1364.23	-1364.22		H2-b
		a-H2-TS		-1364.72	-1364.07	-1364.75	-1364.74	-1364.75	-1364.74	-1364.82		-1364.19	-1364.19	-1364.19	-1364.18		a-H2-TS
		b-H2-TS1		-1364.73	-1364.07	-1364.76	-1364.75	-1364.75	-1364.74	-1364.83		-1364.2	-1364.19	-1364.19	-1364.19		b-H2-TS1
		H2-b'		-1364.73	-1364.07	-1364.76	-1364.75	-1364.75	-1364.74	-1364.83		-1364.2	-1364.19	-1364.19	-1364.19		H2-b'
		b-H2-TS2		-1364.73	-1364.07	-1364.76	-1364.75	-1364.75	-1364.75	-1364.83		-1364.2	-1364.19	-1364.2	-1364.19		b-H2-TS2
	IprPhCAT	a		-1363.57	-1362.93	-1363.6	-1363.59	-1363.6	-1363.59	-1363.67		-1363.05	-1363.05	-1363.05	-1363.04		a	IprPhCAT
		b		-1363.57	-1362.92	-1363.6	-1363.59	-1363.59	-1363.58	-1363.67		-1363.05	-1363.04	-1363.05	-1363.04		b
		H2-a		-1364.76	-1364.09	-1364.8	-1364.79	-1364.8	-1364.79	-1364.86		-1364.23	-1364.22	-1364.23	-1364.22		H2-a
		H2-b		-1364.76	-1364.09	-1364.8	-1364.79	-1364.8	-1364.79	-1364.86		-1364.23	-1364.22	-1364.23	-1364.22		H2-b
		a-H2-TS		-1364.73	-1364.07	-1364.76	-1364.76	-1364.76	-1364.75	-1364.83		-1364.2	-1364.2	-1364.2	-1364.19		a-H2-TS
		b-H2-TS		-1364.73	-1364.07	-1364.76	-1364.75	-1364.76	-1364.75	-1364.83		-1364.2	-1364.19	-1364.19	-1364.19		b-H2-TS

## Sheet: boryl_rotation
				Eo	Go	Gog	dcm	tol	acn	dmso	Eo'		G(dcm)	G(tol)	G(acn)	G(dmso)
	PhCAT-H2	a		-1128.88	-1128.38	-1128.37	-1128.92	-1128.9	-1128.92	-1128.91	-1128.96		-1128.5	-1128.49	-1128.5	-1128.49		a	PhCAT-H2
		Rot(+)		-1128.87	-1128.37	-1128.37	-1128.91	-1128.9	-1128.91	-1128.9	-1128.96		-1128.49	-1128.48	-1128.49	-1128.48		Rot(+)			5.25539
		Rot(-)		-1128.87	-1128.37	-1128.37	-1128.91	-1128.9	-1128.91	-1128.9	-1128.95		-1128.49	-1128.48	-1128.49	-1128.48		Rot(-)			5.77107
		Rot(+)-TS		-1128.86	-1128.36	-1128.36	-1128.9	-1128.89	-1128.9	-1128.9	-1128.95		-1128.48	-1128.47	-1128.48	-1128.48		Rot(+)-TS			8.73993
		Rot(-)-TS		-1128.86	-1128.36	-1128.36	-1128.9	-1128.89	-1128.9	-1128.9	-1128.95		-1128.48	-1128.47	-1128.48	-1128.48		Rot(-)-TS			8.73993
		Rot(+/-)-TS		-1128.86	-1128.35	-1128.35	-1128.9	-1128.88	-1128.9	-1128.89	-1128.94		-1128.48	-1128.46	-1128.48	-1128.47		Rot(+/-)-TS			13.6824
	MesCAT-H2	a		-1364.75	-1364.09	-1364.09	-1364.79	-1364.78	-1364.79	-1364.78	-1364.85		-1364.23	-1364.22	-1364.23	-1364.22		a	MesCAT-H2
		Rot(+)		-1364.74	-1364.09	-1364.08	-1364.78	-1364.77	-1364.78	-1364.77	-1364.84		-1364.22	-1364.21	-1364.22	-1364.21		Rot(+)			5.91808
		Rot(-)		-1364.74	-1364.09	-1364.08	-1364.78	-1364.77	-1364.78	-1364.77	-1364.85		-1364.22	-1364.21	-1364.22	-1364.21		Rot(-)			5.32819
		Rot(+)-TS		-1364.73	-1364.07	-1364.06	-1364.77	-1364.76	-1364.77	-1364.76	-1364.83		-1364.2	-1364.19	-1364.2	-1364.19		Rot(+)-TS			15.0503
		Rot(-)-TS		-1364.73	-1364.07	-1364.06	-1364.77	-1364.76	-1364.77	-1364.76	-1364.83		-1364.2	-1364.19	-1364.2	-1364.19		Rot(-)-TS			15.0503
		Rot(+/-)-TS		-1364.71	-1364.05	-1364.04	-1364.75	-1364.74	-1364.75	-1364.74	-1364.81		-1364.19	-1364.17	-1364.19	-1364.18		Rot(+/-)-TS			25.8334
	IprPhCAT-H2	a		-1364.76	-1364.1	-1364.09	-1364.8	-1364.79	-1364.8	-1364.79	-1364.86		-1364.23	-1364.22	-1364.23	-1364.22		a	IprPhCAT-H2
		Rot(+)		-1364.75	-1364.09	-1364.08	-1364.79	-1364.78	-1364.79	-1364.78	-1364.85		-1364.22	-1364.21	-1364.22	-1364.21		Rot(+)			7.99343
		Rot(-)		-1364.75	-1364.09	-1364.09	-1364.79	-1364.78	-1364.79	-1364.79	-1364.86		-1364.23	-1364.22	-1364.23	-1364.22		Rot(-)			4.8887
		Rot(+)-TS		-1364.74	-1364.08	-1364.07	-1364.78	-1364.77	-1364.78	-1364.77	-1364.84		-1364.22	-1364.2	-1364.21	-1364.21		Rot(+)-TS			12.0211
		Rot(-)-TS		-1364.75	-1364.08	-1364.08	-1364.79	-1364.78	-1364.78	-1364.78	-1364.85		-1364.22	-1364.21	-1364.22	-1364.21		Rot(-)-TS			10.1367
		Rot(+/-)-TS		-1364.73	-1364.06	-1364.06	-1364.77	-1364.76	-1364.77	-1364.76	-1364.83		-1364.2	-1364.19	-1364.2	-1364.2		Rot(+/-)-TS			18.4507

## Sheet: tmp_rotation
				Eo	Gog	dcm	tol	acn	dmso	Eo'		G(dcm)	G(tol)	G(acn)	G(dmso)
	PhCAT-H2	a		-1128.88	-1128.37	-1128.92	-1128.9	-1128.92	-1128.91	-1128.96		-1128.5	-1128.49	-1128.5	-1128.49		a	PhCAT-H2
		a-TS		-1128.86	-1128.36	-1128.9	-1128.89	-1128.9	-1128.89	-1128.95		-1128.48	-1128.47	-1128.48	-1128.47		a-TS
		tw-boat		-1128.87	-1128.37	-1128.91	-1128.9	-1128.91	-1128.9	-1128.96		-1128.49	-1128.48	-1128.49	-1128.48		tw-boat
		b-ts		-1128.86	-1128.35	-1128.9	-1128.89	-1128.9	-1128.89	-1128.94		-1128.48	-1128.46	-1128.48	-1128.47		b-ts
		b		-1128.88	-1128.37	-1128.92	-1128.91	-1128.92	-1128.91	-1128.96		-1128.49	-1128.48	-1128.49	-1128.49		b

## Sheet: structures
H2 activation PhCAT					boryl roation PhCAT-H2					tmp rotation PhCAT-H2					H2 activation MesCAT					boryl roation MesCAT-H2					H2 activation IprPhCAT					boryl roation IprPhCAT-H2
1					63					63					79					81					79					81
H2					PhCAT-H2-Rot(+)					PhCAT-H2-tw-boat					MesCAT-a					MesCAT-H2-Rot(+)					IprPhCAT-a					IprPhCAT-H2-Rot(+)
H	0.757126	2.87155	0		C	1.19401	-2.89992	-0.417832		C	2.42313	-1.41974	-1.00859		B	-0.979248	-0.039198	0.380623		C	-1.54121	-3.16382	0.655845		B	-0.77689	-0.409009	0.233948		C	1.27894	-2.87583	-1.43004
H	0.012726	2.87155	0		C	0.656035	-1.61207	-0.446646		C	3.06753	-0.777617	-2.25665		C	-0.227069	-1.35315	0.870213		C	-1.03699	-1.8683	0.522595		C	0.355517	-0.843664	1.25039		C	0.872044	-1.6479	-0.902629
					C	-0.522946	-1.27825	-1.11895		C	2.37055	0.514653	-2.66511		C	-1.00457	-2.1684	1.71344		C	0.124797	-1.42344	1.17422		C	-0.11616	-1.31055	2.48825		C	-0.376454	-1.06839	-1.15529
61					C	-1.11997	-2.35842	-1.79989		C	2.51455	1.602	-1.5892		H	-2.01388	-1.84689	1.95006		C	0.670062	-2.36956	2.06886		H	-1.18819	-1.39721	2.63832		C	-1.19311	-1.83567	-2.01383
PhCAT-a					C	-0.612597	-3.64425	-1.79258		C	2.58765	1.05554	-0.141223		C	-0.550158	-3.36584	2.24101		C	0.17702	-3.64759	2.24035		C	0.731292	-1.65452	3.52935		C	-0.820193	-3.05276	-2.54874
B	1.29327	0.082796	-0.499283		C	0.55506	-3.92469	-1.08957		H	0.943385	-0.039184	-0.705568		H	-1.18172	-3.94772	2.90261		C	-0.929045	-4.06406	1.50626		H	0.326194	-1.98443	4.47921		C	0.428766	-3.58963	-2.25084
C	0.471318	-1.1815	-0.952349		N	1.38334	-0.5143	0.240588		H	4.13045	-0.58805	-2.08486		C	0.70537	-3.8231	1.87328		N	-1.80035	-0.910455	-0.328909		C	2.10083	-1.60095	3.32265		N	1.84087	-0.879445	-0.077773
C	1.12457	-2.10885	-1.77833		C	1.31421	-0.526845	1.79347		H	3.01508	-1.51155	-3.06437		H	1.07288	-4.7786	2.23164		C	-1.68071	-1.10317	-1.87086		H	2.78857	-1.89828	4.10676		C	2.28482	-1.52429	1.26593
H	2.14575	-1.90726	-2.08705		C	1.77348	0.863068	2.26202		H	1.3093	0.312956	-2.84675		C	1.4947	-3.04964	1.0353		C	-2.1561	0.212443	-2.50476		C	2.59425	-1.18566	2.09424		C	2.92973	-0.387501	2.07528
C	0.508739	-3.2723	-2.21635		C	3.0964	1.33126	1.66457		H	2.77539	0.876452	-3.61199		H	2.46903	-3.4197	0.747707		C	-3.53694	0.664151	-2.0428		H	3.66271	-1.18831	1.9347		C	4.05503	0.332971	1.34186
H	1.03346	-3.95434	-2.87574		C	3.04609	1.29015	0.140093		H	3.4193	2.19023	-1.7649		C	1.08807	-1.79678	0.561631		C	-3.57622	0.779267	-0.523819		C	1.75313	-0.768756	1.05579		C	3.54353	0.907179	0.024762
C	-0.77103	-3.56562	-1.77035		C	2.73438	-0.106473	-0.415693		H	1.66796	2.28974	-1.65982		N	2.01499	-1.00766	-0.198745		C	-3.21615	-0.524983	0.20299		N	2.30774	-0.307884	-0.189093		C	2.94114	-0.149462	-0.910816
H	-1.25783	-4.48835	-2.06701		C	-0.150516	-0.739777	2.17262		N	1.81116	-0.27639	-0.164244		C	3.25653	-0.554263	0.495832		C	-0.20543	-1.33546	-2.17925		C	3.16265	0.918331	-0.119029		C	1.03367	-2.02552	1.98569
C	-1.42784	-2.67956	-0.927291		C	2.13367	-1.63224	2.45865		C	1.1619	-0.684864	1.09853		C	3.6856	0.759536	-0.183387		C	-2.45279	-2.29185	-2.44886		C	3.30631	1.47725	-1.54497		C	3.23535	-2.71703	1.13269
H	-2.41543	-2.93094	-0.565264		C	2.51157	-0.042561	-1.92676		C	-0.23327	-0.591658	1.10004		H	2.90424	1.50304	0.003368		C	-3.11224	-0.260358	1.70108		H	2.32199	1.82029	-1.87545		C	2.23645	0.520344	-2.08867
C	-0.848045	-1.46838	-0.538676		C	3.89667	-1.06837	-0.165369		C	1.90951	-1.10227	2.19488		H	4.6066	1.11874	0.288604		C	-4.29875	-1.58917	0.008109		H	3.95921	2.35467	-1.50837		C	4.02701	-1.06036	-1.48614
N	-1.56885	-0.530511	0.267359		B	-1.40135	0.127873	-1.19786		C	-0.855053	-0.990492	2.29272		C	3.88071	0.608326	-1.68596		B	1.02702	-0.022361	1.08991		C	3.83215	0.450236	-2.53363		B	-1.03041	0.42071	-0.790947
C	-2.802	0.061212	-0.328483		C	-2.74574	-0.003853	-0.274243		C	1.25085	-1.46199	3.35932		H	4.72865	-0.051303	-1.90127		C	2.52399	-0.156147	0.402722		H	4.84487	0.131595	-2.26273		C	-2.63943	0.322293	-0.457955
C	-3.02127	1.42087	0.356666		C	-0.65535	1.57495	-0.947714		H	2.98894	-1.14994	2.15478		H	4.12862	1.57765	-2.12894		C	0.183195	1.3406	0.659649		H	3.90459	0.888848	-3.53336		C	-0.324762	1.40359	0.339033
H	-2.18216	2.07342	0.091614		H	4.00072	1.61165	-0.284744		C	-0.138745	-1.41099	3.40234		C	2.60451	0.070271	-2.31754		H	-4.56951	1.08465	-0.184199		C	2.87992	-0.733949	-2.55581		H	4.34871	1.40897	-0.519169
H	-3.93283	1.87639	-0.043974		H	2.28838	1.99436	-0.221374		H	-1.93939	-0.975144	2.33412		H	2.74734	-0.107952	-3.38912		H	-2.87938	1.56082	-0.201842		H	3.23639	-1.51188	-3.23868		H	2.78152	1.66517	0.236785
C	-3.10588	1.29929	1.87227		H	0.997934	1.58794	2.00413		H	1.8195	-1.78581	4.22311		H	1.827	0.830683	-2.20743		H	-1.43224	0.995925	-2.26697		H	1.91182	-0.391517	-2.93704		H	2.15426	0.340407	2.33411
H	-3.98905	0.720268	2.16386		H	1.8317	0.835597	3.35347		H	-0.662168	-1.70333	4.30612		C	2.08694	-1.22425	-1.66595		H	-2.13542	0.075988	-3.58952		C	2.65245	-1.37384	-1.17501		H	3.28886	-0.813679	3.01574
H	-3.22838	2.28926	2.32172		H	3.92892	0.727641	2.04015		B	-1.1116	-0.013337	-0.157872		C	2.94681	-2.43282	-2.10925		H	-4.31333	-0.020568	-2.39954		C	3.87563	-2.24045	-0.798131		H	4.90263	-0.339384	1.17375
C	-1.83621	0.651532	2.40609		H	3.29008	2.35592	1.9906		C	-2.42181	-0.925261	-0.452499		H	4.01747	-2.24881	-2.04961		H	-3.76035	1.63839	-2.48424		H	3.94979	-3.08354	-1.49117		H	4.42757	1.14686	1.96812
H	-1.90442	0.497883	3.48835		H	-0.827404	-0.086472	1.62498		C	-1.44572	1.56682	0.029182		H	2.72092	-2.67394	-3.15214		H	0.450189	-0.71581	-1.57474		H	3.77	-2.65243	0.207486		H	0.323041	-1.22449	2.16758
H	-1.00362	1.33893	2.22719		H	-0.465879	-1.7675	1.99018		C	-3.62617	-0.36493	-0.895126		H	2.71382	-3.31608	-1.50976		H	0.067005	-2.37744	-2.01717		H	4.81769	-1.69635	-0.851085		H	0.535928	-2.81784	1.42473
C	-1.48362	-0.692694	1.74248		H	-0.263492	-0.528871	3.2384		C	-2.39502	-2.32154	-0.329447		C	0.689294	-1.49489	-2.21437		H	-0.026045	-1.09429	-3.22922		C	1.47133	-2.33582	-1.32504		H	1.33921	-2.42838	2.95392
C	-2.36784	-1.82793	2.30598		H	1.87063	-1.61836	3.5188		C	-1.33503	2.44521	-1.05697		H	-0.027584	-0.753006	-1.86803		H	-2.04111	-2.46823	-3.44529		H	0.54755	-1.80254	-1.55818		H	3.52644	-2.99702	2.14771
H	-3.43091	-1.59641	2.27396		H	1.87404	-2.61987	2.0813		C	-1.84652	2.13199	1.24586		H	0.334521	-2.48334	-1.92178		H	-2.30052	-3.20664	-1.87862		H	1.31274	-2.92672	-0.421906		H	2.73947	-3.58242	0.69633
H	-2.10805	-2.01422	3.35207		H	3.20933	-1.49239	2.39391		C	-4.73404	-1.14691	-1.20547		H	0.713458	-1.45334	-3.30663		H	-3.51766	-2.11473	-2.5748		H	1.6721	-3.02867	-2.14631		H	4.14695	-2.51532	0.580816
H	-2.2011	-2.75612	1.75377		H	2.40244	-1.03872	-2.35722		H	-3.70052	0.713699	-0.995817		C	4.45937	-1.53005	0.519474		H	-2.84785	-1.16021	2.25726		C	4.57565	0.759555	0.497195		H	1.93128	-0.209924	-2.83915
C	-0.045601	-1.02206	2.15624		H	1.63429	0.544858	-2.18342		C	-3.4936	-3.11567	-0.636805		H	4.1972	-2.49061	0.964126		H	-2.38724	0.516189	1.91365		H	5.12677	1.69351	0.353323		H	1.35386	1.07082	-1.7774
H	0.655859	-0.256611	1.81891		H	3.3837	0.437683	-2.37644		H	-1.4921	-2.80599	0.033524		H	5.24306	-1.09229	1.14493		H	-4.08754	0.087546	2.04902		H	5.16441	-0.038164	0.048739		H	2.93553	1.22146	-2.54943
H	0.284695	-1.9888	1.77116		H	4.73607	-0.696993	-0.75797		C	-1.58937	3.80816	-0.940721		H	4.89896	-1.71599	-0.457146		H	-5.22255	-1.16205	0.40518		H	4.52666	0.587012	1.5728		H	4.55747	-0.471829	-2.23798
H	0.011933	-1.05554	3.24711		H	4.23101	-1.11508	0.866512		H	-1.03782	2.0435	-2.02325		C	2.94105	-0.238756	1.95812		H	-4.49191	-1.86529	-1.0223		C	2.44522	1.98359	0.714219		H	4.76807	-1.38612	-0.7606
C	-4.10291	-0.7719	-0.227324		H	3.68125	-2.07471	-0.519052		C	-2.10256	3.49215	1.37903		H	2.09133	0.428682	2.01663		H	-4.0936	-2.48832	0.586409		H	3.02458	2.91065	0.685899		H	3.61188	-1.92737	-1.99734
H	-4.0019	-1.74152	-0.715793		H	2.10547	-3.11262	0.120301		H	-1.94696	1.49649	2.12093		H	3.80204	0.260001	2.41085		H	-2.41786	-3.47588	0.108925		H	2.35396	1.68268	1.75976		H	2.25719	-3.27684	-1.21286
H	-4.90086	-0.233752	-0.747746		H	0.967708	-4.92649	-1.06892		C	-4.67323	-2.52914	-1.08001		H	2.72496	-1.13678	2.54051		H	-1.32264	-5.06863	1.60711		H	1.45164	2.18655	0.320668		H	0.740489	-4.54389	-2.65864
H	-4.44125	-0.938102	0.792898		H	-1.12456	-4.43227	-2.33396		H	-5.65087	-0.673602	-1.54292		C	-2.54221	-0.118963	0.059663		H	0.657677	-4.32659	2.93613		C	-1.92508	-1.44311	-0.089439		H	-1.50144	-3.58729	-3.20194
C	-2.57425	0.318422	-1.82204		H	-2.03452	-2.15366	-2.3461		H	-3.43147	-4.19394	-0.526086		C	-3.12996	-1.17068	-0.68992		H	1.55086	-2.0654	2.62431		C	-3.20791	-1.14568	-0.616425		H	-2.1684	-1.43125	-2.26244
H	-1.66413	0.890368	-1.97941		H	0.789341	0.297758	0.007307		C	-1.96994	4.34014	0.285163		C	-4.49768	-1.16726	-0.969434		H	-1.26843	-0.03516	-0.178022		C	-4.05356	-2.19661	-0.980842		H	1.25995	-0.086265	0.241236
H	-3.41456	0.896844	-2.21509		H	-1.76589	0.16811	-2.36554		H	-1.49125	4.45535	-1.80682		C	-5.34351	-0.167866	-0.523551		H	1.29813	0.136563	2.26337		C	-3.68845	-3.52377	-0.827387		H	-0.958724	0.956924	-1.88395
H	-2.50783	-0.610051	-2.39303		C	-3.66698	1.05649	-0.263458		H	-2.40548	3.89377	2.34091		C	-4.77893	0.857568	0.224752		C	3.07934	-1.2269	-0.332134		C	-2.45409	-3.83496	-0.27447		C	-3.44451	1.28725	-1.08632
C	2.74319	-0.126747	0.069262		C	-4.84337	1.01422	0.47153		H	-5.536	-3.14202	-1.31871		C	-3.42037	0.908195	0.5121		C	4.35362	-1.12536	-0.907951		C	-1.60533	-2.80541	0.089486		C	-4.81321	1.39051	-0.888238
C	3.1635	-1.3611	0.59212		C	-5.15123	-0.107869	1.23559		H	-2.16542	5.40224	0.386738		C	-0.236489	1.35576	0.307694		C	5.15142	-0.007393	-0.762514		C	-0.749421	1.04603	-0.370845		C	-5.44617	0.494015	-0.038603
C	4.44221	-1.53742	1.09899		C	-4.26841	-1.17762	1.24123		H	-0.431709	-0.062271	-1.2044		C	0.33813	1.93302	1.4622		C	4.65056	1.01941	0.030243		C	-1.08919	2.1631	0.410602		C	-4.68817	-0.482677	0.585975
C	5.34693	-0.480889	1.079		C	-3.0921	-1.11946	0.496488		C	4.0334	0.893299	0.332988		C	1.04159	3.12815	1.37265		C	3.3887	0.960109	0.60852		C	-0.996391	3.43724	-0.145658		C	-3.30554	-0.584232	0.396913
C	4.96386	0.749189	0.558893		C	-0.014829	2.22669	-2.01629		H	4.46276	1.89457	0.409507		C	1.2027	3.79737	0.164192		C	-0.597329	1.96962	1.67455		C	-0.590018	3.61985	-1.46124		C	0.285189	2.66199	0.092361
C	3.67552	0.922771	0.070351		C	0.576374	3.47738	-1.8922		H	4.08538	0.445653	1.32622		C	0.570093	3.26861	-0.951287		C	-1.35016	3.10981	1.41644		C	-0.291728	2.51611	-2.24818		C	0.809884	3.40626	1.156
C	0.782974	1.55593	-0.675846		C	0.533613	4.15046	-0.674468		H	4.66118	0.325053	-0.350518		C	-0.167808	2.08614	-0.894914		C	-1.36672	3.71437	0.161678		C	-0.376313	1.24299	-1.70104		C	0.720643	2.98357	2.47354
C	0.391372	2.03188	-1.93094		C	-0.12945	3.56249	0.393831		C	1.88682	2.02908	0.805526		H	1.47724	3.54988	2.27502		C	-0.55138	3.16412	-0.80951		H	-1.24828	4.30584	0.453735		C	0.051054	1.80054	2.74817
C	-0.022646	3.34691	-2.10947		C	-0.713445	2.30535	0.249038		H	0.826014	2.13037	0.580267		H	0.636011	3.79776	-1.89896		C	0.233024	2.02415	-0.577848		H	-0.52172	4.62045	-1.87334		C	-0.451067	1.05245	1.69326
C	-0.077162	4.2114	-1.02371		H	0.984013	5.1317	-0.571248		H	1.99613	1.73198	1.84959		H	-5.42233	1.64916	0.598815		H	-0.490927	3.64509	-1.78381		H	0.007777	2.64491	-3.28258		H	1.13162	3.59105	3.27266
C	0.319623	3.76397	0.231958		H	-0.210244	4.08945	1.33958		H	2.3521	3.00924	0.6745		H	-4.90886	-1.98202	-1.55897		H	-1.93545	3.54978	2.22061		H	-0.137834	0.384388	-2.32013		H	-0.090826	1.46636	3.77108
C	0.767318	2.46003	0.393713		H	-1.27302	1.89955	1.08684		C	3.43746	-2.26765	-0.244546		C	-0.87887	1.67667	-2.16665		H	5.26845	1.89707	0.207717		H	-0.646383	-3.05961	0.522053		H	-1.0126	0.160159	1.92971
H	0.409407	1.36091	-2.78475		H	-0.010483	1.73716	-2.98652		H	2.95738	-2.86307	0.532161		H	-1.61134	0.886574	-2.00972		H	4.73092	-1.96879	-1.48261		H	-2.15617	-4.86708	-0.129573		H	1.27833	4.36349	0.951758
H	-0.316261	3.69224	-3.09464		H	1.05461	3.93852	-2.75041		H	3.88729	-2.95799	-0.962673		H	-0.172179	1.33639	-2.92956		C	2.43713	-2.58773	-0.51991		H	-4.37136	-4.3113	-1.12775		H	-5.18812	-1.19034	1.24167
H	-0.418059	5.23218	-1.15602		H	-2.43003	-1.98042	0.51692		H	4.24278	-1.68589	0.200838		C	0.117284	1.36724	2.84841		H	2.79614	-3.2805	0.249087		H	-5.03078	-1.96985	-1.39365		H	-6.51634	0.548545	0.130779
H	0.291387	4.43623	1.08254		H	-4.49429	-2.06519	1.82459		C	1.26407	-2.32885	-1.43158		H	-0.085787	0.295741	2.84526		H	2.71472	-3.00923	-1.49067		C	-3.75475	0.26413	-0.781409		H	-5.38227	2.15961	-1.40068
H	1.10339	2.13338	1.37311		H	-6.06924	-0.1467	1.81238		H	0.724684	-2.70953	-0.563663		H	-0.731446	1.86684	3.3256		C	6.50532	0.099009	-1.4141		C	-5.06692	0.458691	-0.0118		H	-2.96604	1.97944	-1.77249
H	3.38597	1.88932	-0.327578		H	-5.527	1.85726	0.446764		H	0.544499	-1.81994	-2.0737		C	2.0389	5.04549	0.073304		H	6.49838	0.840021	-2.22021		C	-3.9122	0.634332	-2.25952		C	-2.58965	-1.7131	1.13032
H	5.66804	1.5735	0.538051		H	-3.44997	1.94276	-0.853813		H	1.67767	-3.17938	-1.97717		H	1.74024	5.66468	-0.775375		H	6.81549	-0.85664	-1.84334		H	-3.0396	0.960418	-0.357018		C	-3.02827	-3.0942	0.628561
H	6.34979	-0.617496	1.4691												H	3.09556	4.79022	-0.057793		C	2.99976	2.14316	1.46725		H	-4.94333	0.204808	1.04455		C	-2.77083	-1.63539	2.65312
H	4.73737	-2.49745	1.50768		63					63					C	-2.97542	2.08242	1.35356		H	2.5256	1.8198	2.39606		H	-5.38584	1.50339	-0.075561		H	-1.52591	-1.62118	0.910858
H	2.4682	-2.19339	0.607827		PhCAT-H2-Rot(-)					PhCAT-H2-a-TS					H	-2.33103	2.76582	0.799125		H	2.28905	2.80475	0.964916		H	-5.87714	-0.156681	-0.413175		H	-2.87287	-3.19054	-0.44677
					C	-1.19374	2.90019	0.417542		C	2.41582	-1.43948	-0.923573		H	-2.42555	1.75711	2.23608		C	-2.23114	4.91673	-0.110713		H	-4.26086	1.66634	-2.35778		H	-2.4592	-3.88592	1.12793
61					C	-0.655892	1.61228	0.446493		C	3.16245	-0.929427	-2.19947		C	-6.82048	-0.194058	-0.809109		H	-1.95592	5.39952	-1.05087		H	-2.95723	0.550169	-2.78301		H	-4.08959	-3.26523	0.833746
PhCAT-b					C	0.523078	1.27844	1.11883		C	3.18386	0.575807	-2.57139		H	-7.06569	-0.933646	-1.57376		H	-2.14244	5.65668	0.689121		H	-4.63561	-0.017415	-2.75983		H	-2.54253	-0.640291	3.04288
C	-0.482983	2.25448	1.6663		C	1.1202	2.35861	1.79967		C	2.45835	1.51617	-1.60997		H	-7.17193	0.782407	-1.1524		C	-0.58235	1.4826	3.10778		C	-1.58842	1.97737	1.8369		H	-3.80201	-1.86305	2.93853
C	-0.978181	1.66647	0.496668		C	0.612948	3.64449	1.7922		C	2.56188	1.06993	-0.151435		C	-2.3618	-2.30864	-1.32007		H	-0.684156	0.400963	3.19614		C	-2.85569	2.78937	2.12533		H	-2.1238	-2.36288	3.15542
C	-1.15896	2.49585	-0.618796		C	-0.554683	3.92497	1.08916		H	0.936744	-0.047005	-0.701275		H	-1.50604	-2.62751	-0.734277		H	-1.37882	1.96054	3.68509		C	-0.495463	2.27774	2.86686		C	0.275892	3.32773	-1.27839
C	-0.821245	3.84192	-0.581088		N	-1.38325	0.514499	-0.240658		H	4.19822	-1.26391	-2.114		H	-1.9997	-2.01606	-2.31035		C	1.19709	1.69755	-1.70091		H	-1.86537	0.921518	1.95119		C	1.5878	4.02667	-1.65132
C	-0.330757	4.4023	0.593459		C	-2.73428	0.106639	0.415687		H	2.74761	-1.4873	-3.04005		H	-3.01718	-3.17107	-1.45693		H	1.69233	0.739119	-1.60164		H	-3.62745	2.60282	1.37458		C	-0.896704	4.31606	-1.34498
C	-0.174449	3.60787	1.7227		C	-3.0456	-1.29025	-0.139629		H	2.76692	0.708909	-3.57105		H	-7.38441	-0.445817	0.094402		H	1.99553	2.44702	-1.7043		H	-3.26011	2.52167	3.10538		H	0.077278	2.56006	-2.02485
B	-1.34478	0.143847	0.477717		C	-3.09589	-1.3318	-1.66411		H	4.22832	0.888993	-2.64021		H	-3.84534	2.64305	1.70026		H	7.26832	0.408918	-0.694058		H	-2.65008	3.86348	2.13942		H	2.45135	3.37042	-1.51496
C	-2.72992	-0.312473	-0.104033		C	-1.77325	-0.863178	-2.26187		H	2.86902	2.52467	-1.69983		H	1.95653	5.64698	0.981671		H	3.88402	2.73342	1.71904		H	0.354431	1.6055	2.7425		H	1.56098	4.33615	-2.7001
C	-3.76893	0.606972	-0.324227		C	-1.31416	0.526873	-1.7935		H	1.39469	1.5978	-1.85986		H	-1.41271	2.53593	-2.58101		H	1.35805	-2.5848	-0.447067		H	-0.137272	3.30636	2.75871		H	1.75753	4.92855	-1.05577
C	-5.0054	0.204893	-0.811092		C	-2.51153	0.043496	1.9268		N	1.7951	-0.264347	-0.138024		H	0.98411	1.54256	3.4893		H	-3.28747	4.63459	-0.176812		H	-0.881006	2.15496	3.88336		H	-1.83726	3.81576	-1.10623
C	-5.23339	-1.1348	-1.10139		C	-3.89688	1.06799	0.16482		C	1.12844	-0.625166	1.13215							H	0.374084	1.73762	3.57307							H	-0.758213	5.12973	-0.62535
C	-4.22677	-2.07043	-0.888904		C	0.150547	0.739896	-2.17276		C	-0.266835	-0.552072	1.1074		79					H	0.702604	1.74828	-2.67681		79					H	-0.978523	4.75433	-2.34462
C	-2.99907	-1.66235	-0.388642		C	-2.13377	1.63217	-2.45861		C	1.86418	-0.96559	2.26311		MesCAT-b										IprPhCAT-b
C	-0.414273	-0.928641	1.15609		B	1.4013	-0.127797	1.19795		C	-0.902455	-0.911818	2.306		C	0.060353	2.11862	1.35394		81					B	-0.829231	-0.379309	0.240261		81
C	-0.959923	-1.74986	2.15546		C	0.655035	-1.57478	0.94783		C	1.19233	-1.28266	3.43186		C	-0.419257	1.37901	0.259164		MesCAT-H2-Rot(-)					C	0.307401	-0.875146	1.21626		IprPhCAT-H2-Rot(-)
C	-0.204177	-2.71204	2.80733		C	2.74573	0.003608	0.274307		H	2.94523	-0.983926	2.24554		C	-0.449564	1.99972	-1.00568		C	1.436	-3.29963	0.003025		C	-0.113531	-1.41774	2.44287		C	2.62759	-1.99937	1.60495
C	1.11751	-2.90813	2.42701		H	-1.83177	-0.835764	-3.3533		C	-0.199073	-1.26608	3.44607		C	0.063621	3.28159	-1.16526		C	1.01455	-1.97225	0.124112		H	-1.17825	-1.50199	2.63765		C	1.67821	-1.19143	0.976375
C	1.66712	-2.13062	1.41939		H	-0.997433	-1.58781	-2.00418		H	-1.98747	-0.9139	2.32806		C	0.573277	4.00633	-0.090862		C	-0.268227	-1.59836	0.540803		C	0.780715	-1.83859	3.41274		C	0.35655	-1.06039	1.42168
C	0.929034	-1.12302	0.790129		H	-2.28777	-1.9942	0.222087		H	1.75169	-1.54713	4.32152		C	0.542018	3.41286	1.16286		C	-1.06274	-2.69144	0.955205		H	0.420839	-2.23124	4.35696		C	0.073206	-1.79746	2.58975
N	1.49275	-0.322896	-0.257766		H	-4.00019	-1.61183	0.285239		H	-0.733246	-1.52843	4.35275		B	-0.991478	-0.084362	0.411061		C	-0.665592	-4.00983	0.875594		C	2.14201	-1.77465	3.14584		C	0.991853	-2.60326	3.2358
C	1.47485	-0.939666	-1.6244		H	-3.92871	-0.728705	-2.03988		B	-1.13499	-0.016956	-0.174921		C	-2.53392	-0.342573	0.095922		C	0.589286	-4.32822	0.361592		H	2.86235	-2.12345	3.87784		C	2.28496	-2.71494	2.73623
C	2.82965	-1.59875	-1.95563		H	-3.2891	-2.35664	-1.98982		C	-2.4194	-0.962479	-0.480977		C	-3.51803	0.615504	0.479599		N	2.01654	-0.89497	-0.090605		C	2.58115	-1.28032	1.92808		N	2.10608	-0.38284	-0.19784
C	4.01856	-0.671895	-1.73589		H	-1.63302	-0.541951	2.1837		C	-1.50912	1.55839	-0.013123		C	-4.85589	0.425339	0.15991		C	3.04857	-0.773354	1.07322		H	3.6432	-1.26073	1.7216		C	3.06235	0.799703	0.141068
C	4.0173	-0.151393	-0.3044		H	-2.40462	1.03998	2.35707		C	-3.60847	-0.441037	-1.00596		C	-5.30004	-0.681952	-0.55433		C	3.67004	0.6238	0.941218		C	1.69032	-0.804147	0.958422		C	2.96515	1.753	-1.058
C	2.68502	0.512765	0.105678		H	-3.38263	-0.438624	2.37652		C	-2.38368	-2.35042	-0.28773		C	-4.35367	-1.61946	-0.922671		C	4.2467	0.911344	-0.442192		N	2.16441	-0.297028	-0.300826		C	3.31094	1.08462	-2.38522
C	0.396445	-2.02648	-1.72766		H	-4.73548	0.697859	0.75933		C	-1.46311	2.40925	-1.12587		C	-2.99989	-1.48128	-0.606918		C	3.18632	0.716227	-1.52134		C	3.07224	0.897541	-0.234182		C	2.40668	-0.11677	-2.64036
C	1.11082	0.107847	-2.69552		H	-3.68114	2.07515	0.515965		C	-1.88707	2.14607	1.20028		C	-0.085013	-1.2617	0.957059		C	2.55676	-0.685845	-1.52785		C	4.56839	0.511638	-0.232661		C	2.39311	-1.16219	-1.51311
C	2.73811	0.77211	1.61859		H	-4.23256	1.11228	-0.866747		C	-4.69113	-1.25186	-1.3295		C	-0.740274	-2.12377	1.85846		C	2.26373	-0.895857	2.37909		H	5.1605	1.42418	-0.360896		C	2.51998	1.47399	1.39695
C	2.56988	1.90332	-0.550273		H	0.4658	1.7677	-1.99058		H	-3.69153	0.63044	-1.16113		C	-0.110575	-3.19331	2.46957		C	4.1391	-1.84641	1.09525		H	4.83585	0.111963	0.75169		C	4.51494	0.411166	0.420128
H	-2.00362	-1.62443	2.42789		H	0.827574	0.086843	-1.62499		C	-3.45774	-3.17348	-0.606858		C	1.21082	-3.466	2.14366		C	1.35511	-0.711759	-2.46515		C	4.93608	-0.50918	-1.30367		C	1.23426	-2.13143	-1.72646
H	-0.646709	-3.31763	3.59016		H	0.263529	0.528725	-3.23848		H	-1.4949	-2.80512	0.142139		C	1.87834	-2.64417	1.25067		C	3.54807	-1.74191	-2.01776		H	5.97609	-0.82398	-1.17616		C	3.68412	-1.98139	-1.50827
H	1.7164	-3.67637	2.904		H	-1.87156	1.6177	-3.51896		C	-1.76087	3.76538	-1.03932		C	1.27758	-1.5189	0.670781		B	-1.02205	-0.124215	0.770192		H	4.87961	-0.050576	-2.29633		B	-0.977547	-0.290101	0.789319
H	2.68938	-2.30749	1.10712		H	-3.20942	1.49276	-2.39291		H	-1.18508	1.99061	-2.09058		N	2.04688	-0.672221	-0.204602		C	-0.263479	1.29982	0.337718		C	4.01271	-1.72052	-1.23217		C	-0.738913	1.03929	-0.163663
H	2.94483	-2.4877	-1.32265		H	-1.87348	2.61989	-2.08193		C	-2.18557	3.50015	1.30393		C	2.25599	-1.17536	-1.60067		C	-2.60452	-0.150153	0.299392		H	4.1872	-2.25821	-0.292403		C	-1.95054	-1.40041	0.05801
H	2.80607	-1.95193	-2.99225		H	-2.10515	3.11293	-0.120658		H	-1.93538	1.5348	2.09658		C	3.57349	-1.96847	-1.73635		H	3.60861	0.895782	-2.51378		H	4.24505	-2.4224	-2.04054		H	2.70245	-0.632585	-3.55788
H	3.9869	0.162413	-2.44443		H	-0.967251	4.9268	1.06844		C	-4.62101	-2.62569	-1.13388		C	4.78637	-1.2063	-1.21683		H	2.38906	1.45415	-1.37979		C	2.51845	-1.34536	-1.31453		H	1.38545	0.2397	-2.79245
H	4.95159	-1.20619	-1.93815		H	1.125	4.43253	2.33346		H	-5.59628	-0.807703	-1.73188		C	4.55237	-0.753701	0.218908		H	2.90608	1.37241	1.16721		C	1.69607	-2.61914	-1.08982		H	1.94954	2.16249	-1.10441
H	4.82676	0.571843	-0.158525		H	2.03471	2.15383	2.34593		H	-3.38888	-4.24402	-0.43945		C	3.22716	0.016059	0.421573		H	4.44478	0.713364	1.70768		H	0.633556	-2.43047	-1.25361		H	3.63461	2.59603	-0.867094
H	4.22327	-0.986122	0.375814		H	-0.789267	-0.297535	-0.007279		C	-2.11986	4.31984	0.183011		C	1.11223	-2.10255	-2.00798		H	5.12039	0.281715	-0.639468		H	1.82678	-3.04085	-0.092209		H	4.3648	0.788835	-2.40546
H	1.81244	1.22633	1.97024		H	1.76581	-0.167988	2.36563		H	-1.71254	4.38993	-1.92596		C	2.24128	-0.008962	-2.6149		H	4.60103	1.94455	-0.472446		H	2.0152	-3.36957	-1.8171		H	3.18019	1.80553	-3.19571
H	3.5545	1.47043	1.81844		C	0.713013	-2.30514	-0.248932		H	-2.46964	3.91895	2.26427		C	3.02475	0.191549	1.93045		H	1.34018	-0.326095	2.35929		C	2.16799	-0.878768	-2.7428		H	1.4584	1.67718	1.3075
H	2.92231	-0.130008	2.201		C	0.128833	-3.56218	-0.393791		H	-5.46457	-3.26098	-1.38241		C	3.36196	1.44003	-0.156297		H	2.00998	-1.93509	2.59284		H	2.09172	-1.74922	-3.40006		H	2.68432	0.864675	2.28644
H	1.5861	2.32962	-0.356013		C	-0.534282	-4.15012	0.674493		H	-2.34906	5.37719	0.261262		H	-1.78904	-1.9425	2.07182		H	2.88747	-0.513961	3.19069		H	2.91112	-0.216567	-3.18201		H	3.04053	2.4256	1.52434
H	2.7282	1.88766	-1.62638		C	-0.576975	-3.47706	1.89225		H	-0.436148	-0.062226	-1.21041		H	-0.649991	-3.82094	3.16976		H	4.62169	-1.76991	2.07241		H	1.21063	-0.357776	-2.73974		H	5.01007	1.31693	0.777953
H	3.32615	2.56962	-0.125743		C	0.014407	-2.22646	2.01638		C	4.01333	0.931624	0.302315		H	1.72171	-4.3182	2.57871		H	3.73562	-2.8541	1.02041		C	2.7949	1.72702	1.02591		H	4.59989	-0.32896	1.21338
H	-0.604764	-1.60519	-1.62521		C	3.09237	1.11909	-0.496475		H	4.46803	1.92405	0.260332		H	2.90611	-2.87099	0.999506		H	4.91555	-1.70985	0.34742		H	1.76523	2.07923	1.02579		H	5.06743	0.070218	-0.450053
H	0.519002	-2.81671	-0.985714		C	4.26873	1.17696	-1.24117		H	4.08096	0.587642	1.33517		H	3.47383	-2.91313	-1.18833		H	0.91874	-1.70965	-2.53117		H	3.44951	2.60203	1.01315		H	1.28849	-2.97455	-1.03741
H	0.462703	-2.48067	-2.71934		C	5.15134	0.107032	-1.2354		H	4.60755	0.273623	-0.330986		H	3.71374	-2.23374	-2.79004		H	0.590451	-0.014089	-2.14132		H	2.98072	1.18632	1.95322		H	0.261802	-1.66118	-1.59764
H	0.279188	0.720648	-2.3444		C	4.84321	-1.01495	-0.471283		C	1.84315	2.07529	0.745711		H	4.99303	-0.342229	-1.85658		H	1.68469	-0.410012	-3.46172		C	2.77955	1.84657	-1.41387		H	1.29165	-2.51749	-2.74663
H	0.80782	-0.399331	-3.61581		C	3.66677	-1.05693	0.263639		H	0.793993	2.18996	0.473575		H	5.67725	-1.83932	-1.26838		H	3.78524	-1.48477	-3.05279		H	3.23983	2.81889	-1.21734		H	3.67463	-2.57622	-2.42447
H	1.93269	0.772333	-2.95454		H	6.06937	0.145627	-1.81217		H	1.8984	1.79483	1.79807		H	5.37519	-0.112579	0.553165		H	4.48576	-1.77244	-1.47248		H	1.7047	1.98907	-1.521		H	4.59345	-1.38767	-1.52219
H	-0.341103	1.63837	2.54908		H	5.52664	-1.85814	-0.446425		H	2.33255	3.04402	0.621549		H	4.56297	-1.62923	0.877476		H	3.11019	-2.73856	-2.0334		H	3.17636	1.49483	-2.3636		H	3.72361	-2.68375	-0.677636
H	0.20088	4.04027	2.64367		H	3.44951	-1.94315	0.853982		C	3.3662	-2.27763	-0.064906		H	2.11053	0.742004	2.13062		H	2.42623	-3.53649	-0.355464		C	-0.785737	1.04588	-0.420145		H	3.63498	-2.07332	1.22469
H	-0.073665	5.45516	0.628281		H	2.43045	1.98016	-0.517028		H	2.83699	-2.77976	0.744254		H	3.86332	0.768764	2.32764		H	0.911378	-5.3582	0.264274		C	-0.692335	2.25307	0.304043		H	3.02073	-3.34388	3.22345
H	-0.945708	4.45698	-1.46552		H	4.49481	2.06442	-1.8246		H	3.79269	-3.04949	-0.709591		H	2.9855	-0.753526	2.47158		H	-1.33534	-4.79662	1.20549		C	-0.682234	3.45658	-0.399261		H	0.702949	-3.14777	4.12807
H	-1.55492	2.07503	-1.53774		H	0.010119	-1.73696	2.98664		H	4.19205	-1.70244	0.353154		H	2.38637	1.92252	-0.191861		H	-2.05083	-2.46526	1.34116		C	-0.748353	3.4904	-1.78782		H	-0.93558	-1.72892	2.98211
H	-3.60848	1.6543	-0.094039		H	-1.05527	-3.93816	2.75044		C	1.25227	-2.34652	-1.34363		H	3.79164	1.4593	-1.15576		H	1.4381	-0.047643	0.044463		C	-0.848389	2.3072	-2.50299		H	1.23381	0.120279	-0.429444
H	-5.79214	0.935351	-0.963577		H	-0.984834	-5.13128	0.571237		H	0.695021	-2.70653	-0.478254		H	4.02022	2.03225	0.485707		H	-1.07271	-0.147161	1.98556		C	-0.884544	1.10329	-1.81366		H	-1.57951	0.079222	1.78211
H	-6.19639	-1.45111	-1.48755		H	0.209478	-4.08905	-1.3396		H	0.551536	-1.83918	-2.00782		H	0.164678	-1.56592	-2.00533		C	0.445857	2.09667	1.27578		C	-2.02481	-1.36836	-0.057829		C	-0.771104	0.915854	-1.56092
H	-4.4027	-3.11747	-1.10914		H	1.27252	-1.8993	-1.08675		H	1.6645	-3.21109	-1.86805		H	1.01679	-2.97015	-1.35376		C	1.13508	3.25348	0.885723		C	-3.34408	-1.01239	-0.439795		C	-0.657829	1.99331	-2.43407
H	-2.22754	-2.40443	-0.214422												H	1.29228	-2.46224	-3.02377		C	1.1195	3.72376	-0.413176		C	-4.24621	-2.02272	-0.782485		C	-0.516207	3.26927	-1.91635
					63					63					H	1.52897	0.75267	-2.30179		C	0.312457	3.03634	-1.31344		C	-3.89785	-3.36342	-0.757153		C	-0.519307	3.44052	-0.536548
63					PhCAT-H2-Rot(+)-TS					PhCAT-H2-b-TS					H	1.94664	-0.382858	-3.59929		C	-0.382429	1.88226	-0.961171		C	-2.62354	-3.73216	-0.350867		C	-0.636283	2.36317	0.342996
PhCAT-H2-a					C	-1.21183	-2.76005	-0.862939		C	2.52159	1.33477	-0.297954		H	3.212	0.468482	-2.73812		C	-3.49481	0.711521	0.992799		C	-1.7212	-2.74421	0.003193		C	-3.24696	-1.06758	-0.402656
C	1.92424	-0.333324	2.39468		C	-0.715681	-1.55811	-0.370931		C	2.47722	-1.39691	-0.820059		H	0.908065	3.96868	2.02248		C	-4.85095	0.755146	0.685255		H	-5.25676	-1.7535	-1.07125		C	-4.05056	-2.03693	-1.00503
C	1.19188	-0.228804	1.21602		C	0.647945	-1.21739	-0.359867		C	3.73688	-1.08418	-1.63824		H	0.058705	3.73323	-2.15401		C	-5.4083	-0.042706	-0.307466		H	-4.62542	-4.11704	-1.03895		C	-3.62696	-3.34918	-1.16151
C	-0.20596	-0.275063	1.16206		C	1.47716	-2.17293	-0.970884		C	3.72185	0.281303	-2.29661		H	-5.58141	1.16784	0.480802		C	-4.5478	-0.874953	-1.00082		H	-2.33722	-4.77664	-0.304251		C	-2.37556	-3.70618	-0.686466
C	-0.83564	-0.478262	2.39884		C	1.00837	-3.36736	-1.49865		C	3.77508	1.30721	-1.18194		H	-4.66928	-2.49926	-1.477		C	-3.17833	-0.934812	-0.723922		H	-0.735588	-3.04426	0.336436		C	-1.57148	-2.74233	-0.089078
C	-0.134786	-0.591415	3.58949		C	-0.341867	-3.67925	-1.42692		H	0.997586	0.02441	-0.745712		C	-3.20813	1.86065	1.27893		H	-4.9452	-1.49554	-1.80171		H	-0.998877	0.17799	-2.37056		H	-4.27376	-4.08169	-1.63289
C	1.25279	-0.507731	3.59381		N	-1.67045	-0.530999	0.124632		H	3.83715	-1.8845	-2.37568		H	-2.64807	2.59434	0.696804		H	-5.49527	1.43422	1.2393		H	-0.909718	2.31993	-3.58545		H	-2.02462	-4.72993	-0.772405
N	1.87085	-0.114725	-0.092477		C	-2.57759	0.113324	-0.975175		H	4.61941	-1.14301	-0.991273		H	-2.62198	1.63157	2.16846		H	0.203706	3.42434	-2.32336		H	-0.728251	4.44344	-2.30479		H	-0.606258	-3.05972	0.290711
C	2.54722	1.23884	-0.401795		C	-2.99259	1.47121	-0.392101		H	4.58794	0.392218	-2.95262		C	-2.12037	-2.58698	-1.14245		H	1.68176	3.81055	1.64403		H	-0.617706	4.39496	0.138092		H	-5.04449	-1.76448	-1.34813
C	2.81512	1.2513	-1.91472		C	-3.67021	1.36037	0.973596		H	2.83226	0.415495	-2.92169		H	-1.19465	-2.71187	-0.593239		C	0.447565	1.87245	2.77591		C	-0.684288	2.23255	1.82982		H	-0.444195	4.44789	-0.142031
C	3.57113	0.031445	-2.42518		C	-2.80363	0.601708	1.97754		H	3.90308	2.31922	-1.57371		H	-1.86912	-2.39388	-2.19051		H	-0.063271	2.71525	3.25202		C	-2.0444	1.78561	2.38162		H	-0.430691	4.12908	-2.57208
C	2.79931	-1.23689	-2.08161		C	-2.34401	-0.786157	1.50302		H	4.65607	1.09709	-0.564896		C	-6.75814	-0.853982	-0.883043		H	1.46538	1.84859	3.17866		C	-0.266765	3.55328	2.47574		H	-0.700584	1.83353	-3.50692
C	2.55318	-1.41754	-0.576727		C	-1.73269	0.302979	-2.23298		N	1.85523	-0.095446	-0.163629		H	-6.91691	-1.68966	-1.56725		C	1.90868	4.93378	-0.836011		H	0.045221	1.47788	2.13827		H	-0.94874	-0.067951	-1.98487
C	1.53855	2.33966	-0.073534		C	-3.80741	-0.705222	-1.38051		C	1.18718	-0.337114	1.1392		H	-7.16467	0.048888	-1.34662		H	2.78762	4.64366	-1.42179		H	-2.31149	0.780358	2.04444		C	-0.75103	2.6527	1.83779
C	3.82053	1.49518	0.402128		C	-1.29053	-1.33796	2.46161		C	-0.206599	-0.32062	1.13282		C	-1.07483	1.31992	-2.20196		H	2.25828	5.50265	0.02829		H	-2.02657	1.77042	3.47499		C	-2.22526	2.82664	2.23012
C	1.55784	-2.56002	-0.357582		C	-3.4966	-1.79146	1.46892		C	1.94355	-0.579722	2.28642		H	-2.16627	1.36898	-2.14423		C	-1.34237	1.36843	-2.00935		H	-2.84022	2.46432	2.05855		C	0.047114	3.87475	2.30812
C	3.84784	-1.76906	0.154899		B	1.3292	0.077457	0.44132		C	-0.814585	-0.597976	2.37169		H	-0.807268	0.263657	-2.27009		H	-2.36325	1.65637	-1.74583		H	-0.163432	3.41838	3.55531		H	-0.378452	1.77624	2.37418
B	-1.08763	-0.048438	-0.206287		C	2.95368	-0.030751	0.437802		C	1.3035	-0.824995	3.4847		C	1.16447	5.37596	-0.292826		H	-1.35233	0.28803	-2.10559		H	0.691967	3.9093	2.08957		H	-2.79752	1.92069	2.03054
C	-2.22659	-1.18782	-0.407116		C	0.811772	1.56403	0.014051		H	3.02451	-0.580179	2.24998		H	0.635538	5.92628	-1.07462		C	-6.88541	-0.004176	-0.601483		H	-1.0133	4.33749	2.31464		H	-2.31151	3.05428	3.29715
C	-1.7411	1.4423	-0.257022		H	-3.33926	0.471046	2.92175		C	-0.089932	-0.839181	3.5237		H	2.21412	5.30082	-0.59504		H	-7.11073	-0.466942	-1.56534		C	-3.88318	0.411892	-0.427489		H	-2.67474	3.65163	1.66783
H	3.32577	-2.1248	-2.44129		H	-1.91117	1.19609	2.2006		H	-1.8986	-0.633353	2.40708		C	-0.02954	1.61619	2.77713		H	-7.25932	1.02329	-0.623654		C	-4.99203	0.566631	0.621866		H	1.07683	3.86567	1.94242
H	1.82863	-1.21698	-2.59173		H	-2.10554	2.10977	-0.317131		H	1.88485	-1.01232	4.37983		H	-0.070993	0.528031	2.8416		C	-3.01587	1.63362	2.08928		C	-4.36944	0.85872	-1.80999		H	-0.414843	4.81085	1.9801
H	1.85001	1.31469	-2.43143		H	-3.66436	1.95025	-1.1095		H	-0.603645	-1.04443	4.45652		H	-0.927603	2.01262	3.26182		H	-2.56855	1.07143	2.91297		H	-3.07949	1.08432	-0.141982		H	0.0754	3.89868	3.40088
H	3.35504	2.17265	-2.1477		H	-4.64927	0.880168	0.877663		B	-1.14021	-0.001421	-0.167599		H	1.126	5.96558	0.625708		H	-3.84453	2.22424	2.48689		H	-4.64742	0.252709	1.61047		C	-3.84341	0.317104	-0.193197
H	4.58185	-0.003431	-2.00619		H	-3.8622	2.36457	1.35885		C	-2.23305	-1.19021	-0.39007		H	-4.13597	2.32963	1.61152		C	-2.39882	-1.86646	-1.6335		H	-5.30536	1.6128	0.687398		C	-4.91071	0.277341	0.906214
H	3.69112	0.104101	-3.50876		H	-0.779122	0.77145	-2.01521		C	-1.78311	1.49294	-0.108316		H	-2.6581	-3.53733	-1.11295		H	-1.32663	-1.6854	-1.62274		H	-5.87326	-0.030805	0.369832		C	-4.38812	0.943816	-1.47964
H	0.595067	2.20562	-0.603072		H	-1.55325	-0.645654	-2.74067		C	-3.49137	-0.955379	-0.958729		H	-7.33971	-1.04594	0.02379		H	-2.75141	-1.75918	-2.664		H	-3.57316	0.770856	-2.55169		H	-3.04955	0.970564	0.158143
H	1.32034	2.38666	0.994113		H	-2.2829	0.961978	-2.90871		C	-1.94399	-2.52424	-0.066172		H	-0.760258	1.79916	-3.13163		H	1.3078	5.59968	-1.46079		H	-5.221	0.262001	-2.15114		H	-4.49163	-0.12707	1.83172
H	1.96694	3.29677	-0.379532		H	-4.16726	-0.272876	-2.31657		C	-2.14452	2.12995	-1.30589		H	0.821595	1.95811	3.37071		H	-1.10707	1.79714	-2.98704		H	-4.68583	1.9051	-1.77763		H	-5.29403	1.28244	1.11193
H	4.17021	2.49679	0.142012		H	-3.57331	-1.74768	-1.58539		C	-1.99154	2.22623	1.06517							H	-0.072858	0.968215	3.0744							H	-5.756	-0.354998	0.615704
H	3.62396	1.49365	1.4737		H	-4.63012	-0.656165	-0.673698		C	-4.39527	-1.98281	-1.20629		81					H	-7.45317	-0.541635	0.165333		81					H	-3.61228	0.986783	-2.24824
H	4.6312	0.803194	0.188209		H	-0.984288	-2.34626	2.17738		H	-3.77786	0.061622	-1.20692		MesCAT-H2-a					H	-2.25126	2.32455	1.72544		IprPhCAT-H2-a					H	-5.23636	0.381905	-1.88301
H	1.44491	-2.80009	0.700127		H	-0.402424	-0.710437	2.498		C	-2.83606	-3.56271	-0.310635		C	2.44929	-0.807174	2.39642		H	-2.53995	-2.913	-1.34533		C	-2.70455	-1.9627	-1.60773		H	-4.73028	1.96555	-1.28768
H	0.570989	-2.32832	-0.756441		H	-1.73419	-1.37971	3.45899		H	-0.998049	-2.76248	0.415484		C	1.68301	-0.549967	1.26469							C	-1.90131	-1.13657	-0.828779
H	1.93717	-3.44488	-0.873958		H	-3.72463	-2.04287	2.50667		C	-2.68606	3.4086	-1.33608		C	0.277108	-0.52513	1.26382		81					C	-0.50383	-1.2509	-0.75224		81
H	4.15439	-2.75665	-0.197821		H	-4.41118	-1.41299	1.02396		H	-1.98672	1.60223	-2.24356		C	-0.303993	-0.96441	2.46218		MesCAT-H2-Rot(+)-TS					C	0.025653	-2.33187	-1.47214		IprPhCAT-H2-Rot(+)-TS
H	4.67092	-1.087	-0.043328		H	-3.21394	-2.7198	0.973671		C	-2.5297	3.51079	1.05129		C	0.432766	-1.25794	3.59867		C	-1.79271	-3.11951	-0.659742		C	-0.749728	-3.18046	-2.24834		C	1.74747	-3.13369	-0.512852
H	3.69842	-1.84727	1.2305		H	-2.26619	-2.99089	-0.821756		H	-1.71901	1.79357	2.02312		C	1.8164	-1.13291	3.58541		C	-1.22439	-1.89008	-0.335901		C	-2.12176	-2.98595	-2.33775		C	1.2165	-1.85589	-0.375818
H	3.00388	-0.283404	2.39206		H	-0.72072	-4.61877	-1.81176		C	-4.071	-3.29603	-0.888051		N	2.32747	-0.447394	-0.064557		C	0.162484	-1.64364	-0.329927		N	-2.51178	-0.124235	0.059517		C	-0.160339	-1.56625	-0.404225
H	1.81069	-0.586861	4.51944		H	1.70354	-4.06345	-1.95538		H	-5.36166	-1.7554	-1.64552		C	3.17929	0.794628	-0.395097		C	0.929973	-2.78883	-0.621466		C	-3.12915	1.12461	-0.604293		C	-0.967964	-2.70433	-0.57712
H	-0.670702	-0.744893	4.51977		H	2.54056	-1.96942	-1.01286		H	-2.56993	-4.58043	-0.041805		C	3.30605	0.816309	-1.92706		C	0.39281	-4.02466	-0.94092		C	-3.28757	2.16691	0.514326		C	-0.469934	-3.99232	-0.70045
H	-1.91688	-0.554098	2.41993		H	-1.02455	0.243451	0.338515		C	-2.88139	4.10958	-0.150596		C	3.83177	-0.479641	-2.53199		C	-0.984236	-4.19535	-0.979676		C	-4.03976	1.6627	1.73927		C	0.899586	-4.21656	-0.672891
H	1.01889	-0.081051	-0.70637		H	1.00184	-0.061956	1.61019		H	-2.95294	3.86268	-2.28539		C	2.94756	-1.65328	-2.12462		N	-2.13325	-0.794581	0.103286		C	-3.34101	0.434684	2.31127		N	2.1509	-0.715967	-0.186217
H	-0.34505	-0.131882	-1.21408		C	3.5724	-0.95682	1.29187		H	-2.67382	4.04517	1.98525		C	2.81396	-1.82148	-0.604233		C	-3.13327	-0.222458	-0.948539		C	-3.21166	-0.720523	1.30789		C	2.97415	-0.703084	1.14335
C	-2.0755	-2.25447	-1.30009		C	4.94967	-1.12772	1.33373		H	-4.775	-4.0992	-1.07821		C	2.39732	2.02698	0.047176		C	-3.47496	1.18136	-0.426656		C	-2.12002	1.65248	-1.62205		C	3.27577	0.785242	1.37592
C	-3.04591	-3.2398	-1.45533		C	5.77098	-0.359659	0.51443		H	-3.30009	5.11017	-0.165595		C	4.54382	0.8255	0.292023		C	-4.0282	1.18652	0.997437		C	-4.44782	0.858147	-1.32818		C	4.00231	1.44134	0.199907
C	-4.21933	-3.18154	-0.715367		C	5.19183	0.574593	-0.332814		H	-0.438924	0.004547	-1.19661		C	1.73131	-2.85715	-0.285193		C	-3.08614	0.481199	1.97206		C	-2.28862	-1.79791	1.885		C	3.25762	1.2435	-1.12009
C	-4.41467	-2.11814	0.159075		C	3.808	0.732056	-0.364194		C	2.82355	-2.4727	0.204192		C	4.12425	-2.32178	0.005723		C	-2.69874	-0.944374	1.55127		C	-4.56985	-1.36578	1.03302		C	2.91534	-0.216298	-1.44921
C	-3.43762	-1.14024	0.298463		C	0.31664	2.44498	0.986431		H	3.60049	-2.15406	0.899562		B	-0.629009	-0.010182	-0.021898		C	-2.40274	-0.130394	-2.28203		B	0.450187	-0.189258	0.071711		C	2.09812	-1.2775	2.25441
C	-2.24535	1.91416	-1.47792		C	-0.092205	3.74192	0.686099		H	1.95504	-2.80877	0.769288		C	-1.95556	-0.971219	-0.226633		C	-4.40519	-1.04229	-1.18836		C	1.5679	-0.874349	1.05756		C	4.2691	-1.5253	1.14465
C	-2.82193	3.17046	-1.60469		C	-0.007935	4.21045	-0.618775		H	3.21683	-3.32496	-0.355979		C	-0.956648	1.61037	-0.071352		C	-1.59068	-1.48763	2.45237		C	1.08912	0.959577	-0.903334		C	1.97932	-0.2713	-2.65453
C	-2.92039	4.00743	-0.496909		C	0.506077	3.37513	-1.60587		C	1.38808	-1.94168	-1.75123		H	3.33711	-2.59094	-2.52983		C	-3.88173	-1.90814	1.68158		H	-3.87292	0.056164	3.18804		C	4.15165	-1.04214	-1.81306
C	-2.43796	3.56608	0.726984		C	0.907363	2.08335	-1.28679		H	0.456807	-2.14414	-1.22155		H	1.94716	-1.51982	-2.55097		B	0.975628	-0.307081	0.251464		H	-2.33575	0.715562	2.64837		B	-0.863649	-0.05713	-0.519612
C	-1.85798	2.30413	0.83799		H	-0.322483	5.21931	-0.862872		H	1.16346	-1.2491	-2.56614		H	2.3153	1.03346	-2.34512		C	2.63288	-0.38857	0.172783		H	-2.28559	2.49146	0.82067		C	-2.48565	-0.114472	-0.786924
H	-3.37069	4.99006	-0.588963		H	0.596738	3.73458	-2.62598		H	1.74198	-2.87756	-2.18803		H	3.94847	1.65905	-2.19522		C	0.369602	1.22325	-0.090605		H	-3.78117	3.04243	0.084746		C	-0.426594	1.08176	0.59794
H	-2.51042	4.20597	1.60105		H	1.3068	1.45021	-2.07579		C	2.89439	1.94173	1.05046		H	4.86907	-0.653295	-2.22888		H	-3.53925	0.423191	2.96554		H	-5.08092	1.43535	1.48922		H	3.83813	1.65295	-1.95126
H	-1.47737	1.99282	1.80678		H	0.272314	2.10139	2.01689		H	2.03197	2.0657	1.70428		H	3.8433	-0.393702	-3.62119		H	-2.17189	1.07255	2.07443		H	-4.07188	2.45015	2.49603		H	2.31674	1.80167	-1.08686
H	-2.18566	1.26838	-2.35047		H	-0.467145	4.38921	1.47274		H	3.66109	1.36697	1.5712		H	1.38386	2.04028	-0.353298		H	-2.57312	1.80064	-0.471938		H	-1.15292	1.86743	-1.16824		H	2.336	1.31267	1.57146
H	-3.2001	3.49927	-2.56767		H	3.39242	1.48547	-1.02578		H	3.31093	2.93134	0.845609		H	2.3388	2.09559	1.13375		H	-4.19713	1.62738	-1.11614		H	-1.95825	0.947844	-2.43891		H	3.87731	0.8691	2.28512
H	-3.63434	-0.294937	0.952946		H	5.81904	1.19017	-0.970319		C	1.44865	2.21292	-0.947412		H	2.91775	2.914	-0.320737		H	-5.02214	0.728592	1.02581		H	-2.51195	2.5816	-2.04186		H	5.0249	1.05919	0.118757
H	-5.33867	-2.04399	0.723823		H	6.84842	-0.483467	0.543695		H	1.16864	1.8534	-1.94131		H	4.99371	1.79504	0.066707		H	-4.16119	2.22142	1.32161		H	-4.75112	1.79449	-1.80184		H	4.09378	2.51255	0.394988
H	-4.98117	-3.94494	-0.831368		H	5.3862	-1.85561	2.0108		H	0.54192	2.25861	-0.343776		H	4.4492	0.764034	1.37583		H	-1.45996	0.389455	-2.17758		H	-4.3252	0.123425	-2.1235		H	1.09302	-0.876789	2.23306
H	-2.88933	-4.04881	-2.16213		H	2.946	-1.56297	1.94184		H	1.83849	3.22736	-1.04999		H	5.23648	0.060818	-0.047767		H	-2.22197	-1.11703	-2.71097		H	-5.26078	0.545684	-0.678195		H	2.04344	-2.36525	2.19095
H	-1.18109	-2.30638	-1.91647												H	1.7513	-3.14417	0.76688		H	-3.02497	0.442193	-2.97337		H	-2.28022	-2.69532	1.26535		H	2.54856	-1.00576	3.21191
					63										H	0.730899	-2.50012	-0.515776		H	-4.86429	-0.630803	-2.08987		H	-1.26127	-1.45309	1.99107		H	4.53645	-1.67065	2.19335
63					PhCAT-H2-Rot(+/-)-TS										H	1.92664	-3.74558	-0.890556		H	-4.20249	-2.09161	-1.3921		H	-2.6626	-2.06708	2.8756		H	4.14824	-2.51555	0.710329
PhCAT-H2-b					C	0.000193	-2.17305	2.13701							H	4.22974	-3.36806	-0.290418		H	-5.14436	-0.96995	-0.397604		H	-4.87125	-1.87457	1.95167		H	5.11145	-1.03082	0.671033
B	-1.22471	-0.011552	-0.279122		C	0.00013	-1.06096	1.30019							H	5.00892	-1.79866	-0.347767		H	-1.41924	-2.54975	2.26858		H	-5.3575	-0.658859	0.785025		H	1.76391	-1.30133	-2.94409
H	-0.594828	-0.169698	-1.34716		C	0.000323	0.266641	1.7608							H	4.1051	-2.29981	1.09393		H	-0.646318	-0.968092	2.31088		H	-4.51005	-2.12398	0.253887		H	1.03578	0.23377	-2.46611
C	-0.362463	-0.67118	0.949343		C	0.000613	0.372596	3.16464							H	3.52907	-0.776573	2.36079		H	-1.91094	-1.36297	3.48937		H	-3.77577	-1.82503	-1.64743		H	2.48264	0.22427	-3.4878
C	-0.983179	-1.16261	2.10764		C	0.000704	-0.71491	4.0247							H	2.40221	-1.32502	4.47656		H	-3.97707	-2.14006	2.74426		H	-2.73717	-3.63194	-2.9527		H	4.42227	-0.768996	-2.83464
H	-2.06704	-1.1389	2.15572		C	0.000489	-2.00352	3.5108							H	-0.074256	-1.57563	4.50321		H	-4.83333	-1.49608	1.36073		H	-0.280538	-3.99619	-2.78746		H	5.02015	-0.850371	-1.19185
C	-0.266435	-1.69018	3.17053		N	-0.0002	-1.2858	-0.170797							H	-1.38041	-1.07594	2.50074		H	-3.70537	-2.85183	1.16741		H	1.08949	-2.51823	-1.41744		H	3.94124	-2.11157	-1.81739
H	-0.788496	-2.05664	4.04767		C	1.32581	-1.85194	-0.782492							H	1.46138	-0.283718	-0.636496		H	-2.86383	-3.25413	-0.6561		H	-1.62739	0.260756	0.47998		H	2.81528	-3.29833	-0.49327
C	1.12199	-1.75989	3.1107		C	1.26402	-1.46161	-2.26615							H	0.088815	-0.162688	-1.02621		H	-1.42581	-5.15106	-1.23601		H	-0.28768	0.43261	0.868116		H	1.30661	-5.21535	-0.7772
H	1.69121	-2.1764	3.93349		C	-0.000818	-1.93532	-2.98034							C	-2.01714	-2.02961	-1.16108		H	1.05241	-4.85849	-1.15553		C	1.30099	-0.879422	2.43653		H	-1.15497	-4.82315	-0.830615
C	1.77814	-1.29455	1.98296		C	-1.26534	-1.46165	-2.2656							C	-3.0968	-2.91955	-1.18337		H	2.00765	-2.69535	-0.568886		C	2.18703	-1.35416	3.39209		H	-2.03898	-2.55787	-0.643363
H	2.8571	-1.3504	1.93155		C	-1.32652	-1.85186	-0.781869							C	-4.17493	-2.79589	-0.327805		H	-1.46731	-0.010453	0.202599		C	3.41802	-1.84644	2.98505		H	1.48218	0.05144	-0.018605
C	1.02926	-0.757643	0.94191		C	2.50549	-1.16484	-0.101049							C	-4.17433	-1.69877	0.525958		H	0.739828	-0.436736	1.42282		C	3.72463	-1.8438	1.634		H	-0.433033	0.320767	-1.58528
N	1.68161	-0.252516	-0.289537		C	1.52754	-3.36028	-0.611582							C	-3.11796	-0.794264	0.573093		C	3.45001	-0.448251	-0.981823		C	2.83112	-1.37189	0.666448		C	-2.91469	0.327372	-2.05015
H	0.83713	0.051765	-0.81827		C	-2.50592	-1.16461	-0.100082							C	-1.42127	2.1131	-1.31385		C	4.81412	-0.142904	-0.925571		C	1.65034	2.14402	-0.379314		C	-4.24805	0.395911	-2.42813
C	2.26147	-1.37657	-1.19666		C	-1.52819	-3.36013	-0.610593							C	-1.72452	3.4623	-1.48819		C	5.45979	0.147492	0.26209		C	2.22897	3.08132	-1.24023		C	-5.22952	0.008775	-1.52777
C	3.716	-1.65544	-0.812258		B	0.000261	1.72483	0.916308							C	-1.5828	4.38613	-0.463866		C	4.71317	-0.001045	1.42455		C	2.26567	2.88976	-2.61272		C	-4.84537	-0.457916	-0.280837
H	3.741	-2.17026	0.152734		C	1.42474	1.97528	0.153987							C	-1.11077	3.91041	0.749262		C	3.35228	-0.295348	1.39996		C	1.70189	1.73931	-3.14654		C	-3.50177	-0.537512	0.097859
H	4.11314	-2.36258	-1.54628		C	-1.42431	1.97539	0.154192							C	-0.800044	2.56531	0.963309		C	0.004795	2.10823	0.963833		C	1.12638	0.80581	-2.29653		C	-0.088638	2.42534	0.271228
C	4.58473	-0.403404	-0.753641		H	-2.15494	-1.86906	-2.75328							H	-0.978085	4.61286	1.5688		C	-0.600751	3.34321	0.711488		H	2.72781	3.63074	-3.25629		C	0.296597	3.31594	1.27891
H	4.69519	0.031685	-1.75136		H	-1.34862	-0.371195	-2.33459							H	-2.08022	3.80006	-2.45887		C	-0.834548	3.80945	-0.572595		H	1.71233	1.56784	-4.21815		C	0.320153	2.95373	2.61825
H	5.59254	-0.67315	-0.428605		H	1.34726	-0.371146	-2.33514							H	-5.03676	-1.53127	1.16695		C	-0.393229	3.00679	-1.6128		H	0.691035	-0.086973	-2.73704		C	-0.064847	1.66996	2.96832
C	3.99774	0.62075	0.211497		H	2.1534	-1.86901	-2.75424							H	-3.09033	-3.72664	-1.91346		C	0.200304	1.76379	-1.39003		H	2.67261	3.98194	-0.825737		C	-0.419138	0.776001	1.96701
H	4.59051	1.53977	0.197049		H	-0.00084	-3.02599	-3.07149							C	-1.01551	-2.25578	-2.27836		H	-0.507823	3.35556	-2.63638		H	4.69804	-2.20969	1.32144		H	0.614036	3.67371	3.37449
H	4.05828	0.237919	1.2344		H	-0.001054	-1.54872	-4.00237							H	-0.547739	-3.24323	-2.21043		H	-0.876266	3.97151	1.55491		H	4.13615	-2.21642	3.70897		H	-0.089829	1.36135	4.00829
C	2.5487	1.02087	-0.089115		H	2.42248	-0.083917	-0.114404							H	-0.234214	-1.50225	-2.30095		H	5.21418	0.08839	2.38584		H	1.92405	-1.32513	4.44458		H	-0.720982	-0.218854	2.27219
C	1.98498	1.84272	1.07329		H	2.61382	-1.49371	0.933651							C	-5.30852	-3.78731	-0.326027		H	5.38884	-0.166194	-1.8496		H	0.364511	-0.450069	2.78383		H	0.562888	4.33363	1.01581
H	0.954882	2.1489	0.885867		H	3.41109	-1.43733	-0.647169							H	-5.21952	-4.48247	0.515421		C	3.00916	-1.00483	-2.32327		C	3.31457	-1.37139	-0.779143		H	-5.6149	-0.76989	0.419185
H	2.5964	2.74333	1.16481		H	2.57274	-3.55788	-0.857336							H	-5.32053	-4.37909	-1.24442		H	3.55618	-1.93714	-2.50299		C	3.81047	-2.74919	-1.23554		H	-6.28018	0.060999	-1.79307
H	2.02255	1.30838	2.02125		H	1.38059	-3.68706	0.416176							C	-3.32644	0.417353	1.45389		H	3.25127	-0.333169	-3.15167		C	4.38784	-0.301392	-1.0102		H	-4.51676	0.751983	-3.41752
C	2.44929	1.89345	-1.34706		H	0.925415	-3.97517	-1.2724							H	-3.49053	1.31063	0.845846		C	6.91041	0.548107	0.303339		H	2.4768	-1.0986	-1.41621		H	-2.15962	0.64254	-2.76415
H	1.40763	2.02292	-1.65		H	-2.61337	-1.49262	0.934974							H	-2.47417	0.635352	2.09325		H	7.41274	0.135482	1.18246		H	3.07079	-3.52972	-1.03323		C	-3.19255	-1.08512	1.48304
H	3.02456	1.5202	-2.19041		H	-2.42331	-0.083656	-0.114437							C	-1.94853	5.8349	-0.654597		H	7.01271	1.63757	0.34895		H	4.01747	-2.74072	-2.31016		C	-3.85716	-2.43958	1.75828
H	2.83701	2.88362	-1.10188		H	-3.41185	-1.4379	-0.64529							H	-1.38839	6.47977	0.027118		C	2.73939	-0.641972	2.74511		H	4.73525	-3.03705	-0.726996		C	-3.56569	-0.070874	2.57026
C	1.40894	-2.63797	-1.02556		H	-2.57295	-3.55803	-0.857997							H	-3.014	5.9982	-0.461577		H	2.09456	-1.51933	2.66324		H	3.99637	0.693107	-0.787173		H	-2.117	-1.25876	1.52582
H	0.365103	-2.44206	-1.27909		H	-0.924842	-3.97528	-1.27002							C	-1.59998	1.22431	-2.52248		H	2.14154	0.157575	3.18146		H	5.26371	-0.478331	-0.377206		H	-3.60648	-3.17054	0.985229
H	1.45234	-3.04056	-0.014855		H	-1.38293	-3.68623	0.417628							H	-2.29238	0.404781	-2.32134		C	-1.53536	5.11742	-0.825618		H	4.71524	-0.307128	-2.05453		H	-3.52183	-2.83683	2.72152
H	1.79367	-3.39477	-1.71281		H	-1.8e-05	-3.17476	1.73449							H	-0.652517	0.767111	-2.82504		H	-1.15776	5.60104	-1.72966		C	1.66938	2.43939	1.1147		H	-4.94702	-2.35749	1.7995
C	2.14066	-0.949608	-2.66728		H	0.000542	-2.8681	4.164							C	-0.302265	2.24416	2.3577		H	-1.40198	5.80785	0.010386		C	1.04191	3.79919	1.44243		H	-3.09291	0.895233	2.38399
H	1.14333	-0.559902	-2.88353		H	0.000934	-0.55552	5.09753							H	0.638646	1.69526	2.36254		C	0.336438	1.85742	2.41714		C	3.08399	2.32094	1.69221		H	-4.64942	0.082291	2.59326
H	2.28896	-1.83477	-3.28818		H	0.00077	1.37134	3.58533							H	-1.01262	1.6361	2.92245		H	0.039687	0.875035	2.77883		H	1.06304	1.68397	1.61128		H	-3.25421	-0.422365	3.56005
H	2.87965	-0.214557	-2.97424		H	-0.000233	-0.31808	-0.514932							H	-6.27524	-3.28495	-0.233633		H	-0.130532	2.61332	3.05337		H	0.032175	3.87536	1.02598		C	-0.256274	2.98271	-1.13667
C	-2.64208	-0.770455	-0.489792		H	0.000344	2.54759	1.81621							H	-4.19935	0.277743	2.09618		C	0.711917	1.05743	-2.61517		H	0.977474	3.93884	2.52614		C	0.725177	4.09803	-1.5156
C	-3.84702	-0.082345	-0.664534		C	2.54848	2.11147	0.991937							H	-1.53461	-2.21522	-3.24105		H	0.527597	-0.014284	-2.58136		H	1.62816	4.63023	1.03885		C	-1.69798	3.48643	-1.304
C	-5.05088	-0.747305	-0.882167		C	3.83571	2.27849	0.506438							H	-1.74692	6.16471	-1.67708		H	1.79041	1.20102	-2.6896		H	3.47783	1.31333	1.54055		H	-0.116435	2.15925	-1.83869
C	-5.08551	-2.13435	-0.931446		C	4.06354	2.33262	-0.867172							H	-1.98187	1.7979	-3.36983		H	7.44432	0.204165	-0.586066		H	3.76669	3.03362	1.21717		H	1.7639	3.84003	-1.28982
C	-3.90369	-2.84735	-0.757641		C	2.98039	2.23743	-1.72552							H	-0.15099	3.1677	2.92112		H	3.53544	-0.878796	3.45593		H	3.07893	2.52139	2.76827		H	0.654549	4.30158	-2.58778
C	-2.7107	-2.17054	-0.540025		C	1.69157	2.06567	-1.21756												H	1.95452	-1.24644	-2.37172							H	0.497589	5.03524	-0.99898
C	-1.36487	1.59395	-0.071071		C	-2.54774	2.11238	0.992396							81					H	-2.61206	4.96583	-0.960034		81					H	-2.41954	2.70352	-1.06956
C	-1.21071	2.47945	-1.1443		C	-3.83504	2.27978	0.50721							MesCAT-H2-b					H	1.41764	1.93197	2.55407		IprPhCAT-H2-b					H	-1.87948	4.33319	-0.633375
C	-1.30322	3.85972	-0.988886		C	-4.06325	2.33351	-0.866347							B	-0.918777	-0.050886	-0.247268		H	0.255405	1.4572	-3.52439		C	2.79372	-0.934063	2.09428		H	-1.87577	3.81971	-2.33155
C	-1.56584	4.40046	0.263469		C	-2.98041	2.23742	-1.72497							H	-0.50088	-0.430836	-1.34133							C	1.79771	-0.541368	1.20922		81
C	-1.74707	3.54604	1.34617		C	-1.69152	2.06525	-1.21732							C	-0.209393	-1.1083	0.821934		81					C	0.438298	-0.489297	1.52987		IprPhCAT-H2-Rot(+/-)-TS
C	-1.64796	2.17022	1.17454		H	-5.0672	2.46564	-1.2549							C	-0.968428	-1.79817	1.78347		MesCAT-H2-Rot(+/-)-TS					C	0.128709	-0.88923	2.83828		C	1.86224	-0.986379	2.69883
H	-1.77961	1.52475	2.0387		H	-3.13096	2.29943	-2.79848							H	-2.02999	-1.5789	1.83653		C	1.98423	-1.75789	2.26875		C	1.09812	-1.28322	3.74877		C	1.22728	-0.638396	1.50765
H	-1.96324	3.95528	2.32801		H	-0.887091	2.00085	-1.93836							C	-0.434366	-2.74549	2.63969		C	1.23207	-1.13833	1.26797		C	2.4403	-1.30126	3.38205		C	-0.128275	-0.285522	1.40953
H	-1.6367	5.47493	0.394153		H	-2.39389	2.07289	2.06712							H	-1.07342	-3.24594	3.35907		C	-0.073372	-0.652034	1.45375		N	2.13536	-0.193768	-0.189527		C	-0.803384	-0.354644	2.6464
H	-1.1738	4.51315	-1.84611		H	-4.66635	2.37378	1.1988							C	0.918887	-3.06293	2.57179		C	-0.627241	-1.05723	2.68858		C	2.95219	1.1173	-0.37835		C	-0.209082	-0.714633	3.8429
H	-1.01673	2.07054	-2.13357		H	0.886849	2.00209	-1.93835							H	1.35091	-3.80812	3.2293		C	0.061222	-1.74063	3.67248		C	4.44697	0.805536	-0.509362		C	1.14491	-1.02307	3.87903
H	-3.84541	1.00297	-0.628969		H	3.13065	2.29984	-2.79904							C	1.71253	-2.41218	1.64473		C	1.40729	-2.04222	3.49038		C	4.78506	-0.297697	-1.50072		N	2.02224	-0.704896	0.254291
H	-5.96591	-0.177774	-1.01196		H	5.06743	2.46441	-1.25597							H	2.76551	-2.65347	1.58004		N	1.77974	-1.1785	-0.116895		C	4.05464	-1.5759	-1.11454		C	3.15654	0.349386	0.05728
H	-6.02179	-2.65588	-1.09985		H	4.66729	2.37185	1.19781							C	1.147	-1.45335	0.809088		C	3.06063	-0.37009	-0.480151		C	2.53282	-1.42599	-1.06424		C	3.36908	0.399197	-1.46373
H	-3.91481	-3.93254	-0.789523		H	2.39493	2.07159	2.06669							N	2.02083	-0.784254	-0.196612		C	3.07951	-0.32724	-2.01679		C	2.39402	1.84215	-1.60942		C	3.64539	-0.963486	-2.10048
H	-1.80294	-2.7512	-0.390155												H	1.37828	-0.082967	-0.588139		C	3.02067	-1.69162	-2.69277		C	2.74235	2.04278	0.82043		C	2.5705	-1.99475	-1.74745
					63										C	2.37492	-1.70244	-1.42275		C	1.78064	-2.46315	-2.24587		C	1.94647	-1.23864	-2.47231		C	2.35034	-2.15088	-0.23506
63					PhCAT-H2-Rot(-)-TS										C	3.71202	-2.41458	-1.20357		C	1.68913	-2.63191	-0.721886		C	1.9109	-2.69211	-0.468014		C	2.63091	1.68645	0.559556
PhCAT-a-H2-TS					C	1.21184	-2.7598	-0.863649							H	3.58838	-3.1768	-0.427511		C	2.89722	1.04647	0.047701		B	-0.700272	0.030246	0.46546		C	4.46434	0.064967	0.799845
C	-1.95847	-0.731694	2.23059		C	0.715688	-1.55798	-0.371348							H	3.93036	-2.95437	-2.12928		C	4.35903	-0.927651	0.104996		C	-2.13977	-0.718089	0.64731		C	1.16128	-3.05561	0.096164
C	-1.19229	-0.423701	1.1022		C	-0.647897	-1.21714	-0.360527							C	4.85903	-1.49161	-0.83255		C	0.357415	-3.25162	-0.27856		C	-0.899869	1.65018	0.538908		C	3.57373	-2.80377	0.419055
C	0.21261	-0.397969	1.20773		C	-1.47706	-2.17232	-0.972158							H	5.07327	-0.790113	-1.64414		C	2.77854	-3.60585	-0.255528		H	4.4141	-1.92067	-0.13952		B	-1.11251	0.242759	0.133898
C	0.777981	-0.710296	2.4531		C	-1.00825	-3.3666	-1.50026							H	5.77124	-2.07415	-0.682244		B	-1.05032	0.544362	0.70671		H	4.27306	-2.37917	-1.82414		C	-0.47509	1.34555	-0.919366
C	0.00866	-1.00566	3.56864		C	0.341931	-3.67868	-1.42823							C	4.50908	-0.750609	0.445764		C	-0.251292	1.88159	0.156504		H	4.94223	1.74022	-0.786722		C	-1.94757	-0.986964	-0.581244
C	-1.37307	-1.01231	3.45621		N	1.67037	-0.53107	0.12476							H	5.30008	-0.04304	0.709524		C	-2.46514	0.022183	0.020075		H	4.83814	0.533878	0.476889		H	2.83435	-2.97473	-2.15368
N	-1.82378	-0.16659	-0.168465		C	2.34359	-0.786608	1.50326							H	4.4541	-1.46389	1.27377		H	1.77211	-3.46398	-2.68588		H	5.86332	-0.474781	-1.49809		H	1.62534	-1.70672	-2.21963
C	-2.38343	-1.37073	-0.863834		C	2.80289	0.601184	1.97831							C	3.2103	0.064512	0.390471		H	0.886849	-1.95538	-2.61552		H	4.52772	0.005169	-2.52004		H	2.47889	0.846939	-1.91992
C	-2.62018	-1.00171	-2.33884		C	3.66973	1.36017	0.974822							C	2.88548	0.536818	1.8061		H	2.22637	0.279809	-2.34698		H	2.60776	1.34304	-2.5516		H	4.19797	1.08369	-1.66268
C	-3.44451	0.264619	-2.51677		C	2.99259	1.4713	-0.391093							H	2.03523	1.21177	1.80628		H	3.97601	0.218758	-2.32106		H	1.31233	1.97662	-1.51389		H	4.63296	-1.32975	-1.80381
C	-2.74986	1.41414	-1.80288		C	2.5778	0.113555	-0.974637							H	3.75383	1.09522	2.16399		H	3.93153	-2.26018	-2.48278		H	2.8415	2.83651	-1.65597		H	3.68213	-0.846112	-3.18605
C	-2.51745	1.15298	-0.304907		C	1.28995	-1.3389	2.46139							H	2.70145	-0.282622	2.49763		H	2.98978	-1.55743	-3.77665		H	3.29103	2.96589	0.618819		H	1.67008	1.92656	0.116453
C	-1.34229	-2.4982	-0.830166		C	3.49637	-1.79171	1.46916							C	3.37619	1.31707	-0.479186		H	2.06313	1.56007	-0.422		H	1.69156	2.29811	0.95193		H	2.53464	1.69779	1.64654
C	-3.6801	-1.95803	-0.266587		C	1.7333	0.303541	-2.23267							H	2.42236	1.82838	-0.628161		H	2.75048	1.05862	1.12824		H	3.12088	1.61949	1.74963		H	3.33722	2.46524	0.263144
C	-1.59489	2.26113	0.213134		C	3.80772	-0.7049	-1.3798							H	3.82778	1.11981	-1.44873		H	3.80816	1.6039	-0.180362		H	2.01385	-2.19239	-2.99848		H	5.04954	0.985291	0.745986
C	-3.8489	1.28917	0.463639		B	-1.32908	0.077519	0.440995							H	4.03472	2.00836	0.049938		H	5.16537	-0.294366	-0.271227		H	0.891554	-0.958176	-2.43212		H	4.30859	-0.144912	1.85662
B	1.29422	0.008124	0.106296		C	-0.811795	1.5641	0.01366							C	1.28592	-2.75571	-1.61295		H	4.37144	-0.840276	1.19107		H	2.47776	-0.502823	-3.07106		H	5.07045	-0.722301	0.364055
C	1.70939	1.54369	0.011165		C	-2.95355	-0.030866	0.43791							H	0.318101	-2.28983	-1.77573		H	4.59502	-1.94847	-0.171675		H	0.833504	-2.59286	-0.344171		H	1.19145	-3.3584	1.14408
C	2.36546	-1.09325	-0.311483		H	3.66462	1.95052	-1.10814							H	1.21125	-3.43845	-0.767759		H	0.440112	-3.65259	0.73266		H	2.10012	-3.51432	-1.1615		H	0.194887	-2.60005	-0.088347
H	-3.31936	2.3424	-1.90898		H	2.1055	2.10984	-0.316299							H	1.54492	-3.33822	-2.50019		H	-0.47659	-2.55936	-0.281285		H	2.34193	-2.95327	0.497216		H	1.23417	-3.95179	-0.524854
H	-1.77451	1.58342	-2.27456		H	1.91028	1.1954	2.20125							C	2.40066	-0.830308	-2.68223		H	0.128555	-4.07517	-0.95959		H	3.83312	-0.956024	1.78992		H	3.49282	-3.87351	0.215519
H	-1.64572	-0.857301	-2.81987		H	3.33825	0.470341	2.92265							H	1.48955	-0.234184	-2.75435		H	2.41804	-4.60367	-0.515135		H	3.20369	-1.60555	4.08845		H	4.52739	-2.47624	0.017562
H	-3.09702	-1.8518	-2.83627		H	4.64887	0.880101	0.879093							H	2.43373	-1.48817	-3.55251		H	3.7358	-3.47973	-0.753313		H	0.808717	-1.58177	4.75047		H	3.58089	-2.68905	1.50138
H	-4.45901	0.124079	-2.12849		H	3.8615	2.3643	1.36039							H	3.25864	-0.166055	-2.74355		H	2.9219	-3.59399	0.822192		H	-0.913423	-0.896257	3.13984		H	2.91232	-1.23737	2.71562
H	-3.55181	0.494261	-3.5808		H	0.401628	-0.71168	2.49757							C	-2.56246	-0.214679	-0.296194		H	3.013	-2.03592	2.09547		H	1.17813	0.02683	-0.537729		H	1.63574	-1.29134	4.807
H	-0.383251	-2.18172	-1.24113		H	0.984175	-2.34728	2.17691							C	-3.51839	0.771131	0.055042		H	1.99029	-2.51241	4.27337		H	-0.271584	-0.212682	-0.667982		H	-0.799954	-0.742777	4.75186
H	-1.17811	-2.86383	0.185642		H	1.73328	-1.38065	3.45893							C	-4.88741	0.479121	0.042295		H	-0.437041	-2.00055	4.59999		C	-2.99875	-0.221677	1.64271		H	-1.85478	-0.09403	2.65473
H	-1.70489	-3.33449	-1.4333		H	3.72379	-2.04382	2.50688							C	-5.38922	-0.75679	-0.326235		H	-1.65317	-0.763157	2.88181		C	-4.26096	-0.742253	1.88464		H	1.32614	-0.380576	-0.430437
H	-3.95373	-2.85281	-0.833127		H	3.2142	-2.71975	0.973079							C	-4.46723	-1.70853	-0.736837		H	1.05328	-0.665238	-0.628355		C	-4.72407	-1.79403	1.10515		H	-1.91553	0.893353	0.748396
H	-3.5365	-2.26522	0.769905		H	4.41116	-1.41276	1.02506							C	-3.09875	-1.45296	-0.74021		H	-1.45056	0.970365	1.75201		C	-3.90647	-2.30063	0.108723		C	-0.185993	1.06279	-2.26205
H	-4.52677	-1.27563	-0.311061		H	1.55375	-0.645008	-2.74048							C	-0.337182	1.47019	-0.069733		C	0.432845	2.65727	1.14305		C	-2.62599	-1.78904	-0.128304		C	0.272301	2.01346	-3.17138
H	-1.37665	2.14841	1.27702		H	0.779788	0.772262	-2.01515							C	-0.139397	2.27582	-1.21451		C	1.118	3.81995	0.809518		C	-1.45963	2.37994	-0.533735		C	0.440141	3.32284	-2.75916
H	-0.649115	2.28018	-0.326452		H	2.2839	0.962421	-2.9082							C	0.424911	3.54757	-1.11063		C	1.17253	4.30111	-0.494484		C	-1.61813	3.76323	-0.42628		C	0.132689	3.65442	-1.44511
H	-2.08419	3.22805	0.070092		H	4.16805	-0.272108	-2.31546							C	0.789517	4.08826	0.116551		C	0.471343	3.5909	-1.45043		C	-1.26311	4.45254	0.725165		C	-0.309457	2.70377	-0.526007
H	-4.25021	2.29326	0.29982		H	4.63009	-0.656283	-0.672557							C	0.506918	3.33996	1.2531		C	-0.244654	2.42443	-1.1465		C	-0.746588	3.74719	1.80168		C	-3.31408	-1.26004	-0.30628
H	-4.61031	0.579122	0.146258		H	3.57361	-1.74724	-1.58532							C	-0.058097	2.06673	1.17862		C	-3.6715	0.486376	0.620228		C	-0.572291	2.37241	1.69433		C	-3.96299	-2.31577	-0.951898
H	-3.69622	1.17545	1.53785		H	2.26617	-2.99077	-0.822264							H	0.708575	3.77134	2.23131		C	-4.91034	-0.02793	0.249529		H	-1.40306	5.52679	0.782921		C	-3.3246	-3.12644	-1.87954
H	-3.0362	-0.750884	2.1479		H	0.72078	-4.6181	-1.81331							H	0.562005	4.14142	-2.0114		C	-5.05016	-1.00419	-0.731523		H	-0.478508	4.26158	2.71898		C	-1.99947	-2.8709	-2.18254
H	-1.99609	-1.24269	4.31318		H	-1.70336	-4.06243	-1.95747							H	-5.58699	1.26092	0.327954		C	-3.89873	-1.39676	-1.3872		H	-0.15454	1.83804	2.54378		C	-1.35488	-1.82363	-1.53675
H	0.486721	-1.23586	4.51419		H	-2.54043	-1.96868	-1.01433							H	-4.82355	-2.67779	-1.07827		C	-2.64439	-0.882079	-1.04557		H	-2.04895	4.31773	-1.25473		H	-3.86186	-3.93678	-2.36057
H	1.86026	-0.727388	2.54664		H	1.02443	0.243324	0.338716							C	-3.18689	2.20452	0.421734		H	-3.96892	-2.1065	-2.20956		H	-4.27573	-3.1176	-0.505086		H	-1.46865	-3.47345	-2.91304
H	-0.139804	0.007177	-1.13152		H	-1.0014	-0.061869	1.60978							H	-2.59554	2.70071	-0.348469		H	-5.80346	0.350115	0.741831		H	-5.71265	-2.21063	1.26625		H	-0.319436	-1.65669	-1.80535
H	0.554488	-0.060085	-1.47887		C	-0.316584	2.44506	0.985991							H	-2.62652	2.28845	1.35237		H	0.456302	3.9585	-2.47423		H	-4.88499	-0.31952	2.66529		H	-5.0062	-2.51262	-0.73233
C	2.00219	2.17874	-1.20219		C	0.092279	3.74198	0.685608							C	-2.22228	-2.55075	-1.29243		H	1.63097	4.37205	1.59378		H	-2.67141	0.629536	2.23316		H	0.244875	4.6872	-1.13276
C	2.37086	3.51646	-1.25599		C	0.007954	4.21046	-0.619285							H	-1.46023	-2.87556	-0.581848		C	0.481878	2.26426	2.6019		C	-1.81752	-2.4185	-1.25284		H	0.785591	4.08528	-3.44922
C	2.47347	4.25614	-0.083672		C	-0.506137	3.37513	-1.60633							H	-1.7083	-2.20384	-2.1938		H	-0.521918	2.19863	3.02855		C	-2.4753	-2.20343	-2.62065		H	0.474974	1.72734	-4.19874
C	2.19941	3.64656	1.13353		C	-0.907457	2.08336	-1.28719							C	-6.86446	-1.05772	-0.285142		H	1.054	2.99762	3.17507		C	-1.54019	-3.90408	-0.998638		H	-0.36204	0.065258	-2.64243
C	1.81547	2.31139	1.17548		C	-3.80822	0.732673	-0.362999							H	-7.45805	-0.14131	-0.327175		C	1.9236	5.56318	-0.828541		H	-0.857469	-1.90545	-1.28111		C	-0.62925	3.16967	0.892321
C	3.57805	-0.745387	-0.92188		C	-5.19203	0.575098	-0.331206							H	-7.13231	-1.58278	0.637967		H	2.94398	5.53439	-0.434843		H	-2.63999	-1.1395	-2.80991		C	-2.08012	3.66131	0.974863
C	4.51633	-1.70648	-1.27729		C	-5.77079	-0.360006	0.515367							C	-0.447154	1.40283	2.48276		H	1.43205	6.43897	-0.393308		H	-1.84582	-2.60345	-3.42288		C	0.313744	4.25376	1.42872
C	4.26581	-3.04946	-1.02506		C	-4.9491	-1.12882	1.33359							H	0.270182	0.646947	2.81223		C	-0.995355	1.82139	-2.31077		H	-3.44664	-2.70404	-2.67853		H	-0.532072	2.30572	1.55162
C	3.07807	-3.42211	-0.406531		C	-3.57186	-0.957809	1.29132							H	-1.40709	0.892225	2.39325		H	-1.92838	1.36018	-1.99588		H	-2.46363	-4.49066	-1.01185		H	-2.77562	2.88417	0.656638
C	2.14742	-2.45448	-0.05324		H	-6.8482	-0.483902	0.54495							C	-0.638663	1.83684	-2.57161		H	-0.398288	1.06399	-2.82971		H	-0.876035	-4.31331	-1.76778		H	-2.33303	3.95244	1.99956
H	4.99688	-3.80195	-1.30026		H	-5.38529	-1.8574	2.01013							H	-1.66883	1.47784	-2.50138		C	-6.39807	-1.58455	-1.06956		H	-1.0701	-4.05246	-0.02242		H	-2.22242	4.53382	0.328542
H	2.88023	-4.46718	-0.194329		H	-2.94517	-1.56457	1.94044							H	-0.060208	1.01103	-2.99276		H	-6.7164	-2.30518	-0.309001		C	-1.97779	1.68269	-1.78445		H	1.36536	3.98325	1.30543
H	1.23506	-2.75964	0.446562		H	-3.39292	1.48675	-1.02401							C	1.44408	5.44142	0.213369		H	-6.37797	-2.10408	-2.03062		C	-1.49846	2.32868	-3.08823		H	0.156082	5.2176	0.935383
H	3.79942	0.299241	-1.11066		H	-5.81954	1.19125	-0.967861							H	1.1468	6.0867	-0.616674		C	-3.69597	1.59113	1.65702		C	-3.50833	1.58638	-1.7454		H	0.128067	4.40683	2.49574
H	5.44733	-1.40633	-1.74578		H	-1.30695	1.45018	-2.07614							H	2.53563	5.35274	0.186004		H	-3.36537	1.24141	2.63937		H	-1.59431	0.662268	-1.77317		C	-4.14815	-0.367931	0.60635
H	1.57733	1.86341	2.13477		H	-0.596828	3.73454	-2.62644							H	-2.82022	-3.42369	-1.56392		H	-4.71221	1.97972	1.76443		H	-0.407241	2.40582	-3.11862		C	-5.29948	-1.07675	1.32411
H	2.27197	4.21566	2.05403		H	0.322522	5.2193	-0.863441							H	-7.16366	-1.69445	-1.12206		C	-1.53134	-1.26082	-1.98882		H	-1.8199	1.73087	-3.94692		C	-4.66607	0.830077	-0.199635
H	2.76075	5.3011	-0.120252		H	0.46726	4.38929	1.47222							H	-4.1105	2.7741	0.547397		H	-0.57996	-0.85723	-1.64802		H	-1.90595	3.33513	-3.22262		H	-3.48903	0.025461	1.37829
H	2.57715	3.98281	-2.21331		H	-0.272207	2.10149	2.01646							H	1.17961	5.94485	1.1464		H	-1.7182	-0.829554	-2.97675		H	-3.88517	1.04155	-2.61754		H	-4.95679	-1.98132	1.83428
H	1.92267	1.62098	-2.13166												H	-0.606626	2.66686	-3.28129		H	1.98188	5.71675	-1.90855		H	-3.83855	1.06078	-0.846612		H	-5.73438	-0.407501	2.07241
															H	-0.53181	2.14994	3.27598		H	-1.23054	2.5942	-3.04644		H	-3.96095	2.58358	-1.74754		H	-6.10691	-1.35769	0.640939
63																				H	0.94185	1.28442	2.75441							H	-3.83858	1.35651	-0.680888
PhCAT-b-H2-TS															81					H	-7.16376	-0.805652	-1.12144		81					H	-5.35062	0.491818	-0.984747
B	1.37897	0.015202	0.110929												MesCAT-H2-b'					H	-3.04074	2.41811	1.37718		IprPhCAT-a-H2-TS					H	-5.20294	1.5362	0.44267
H	0.76504	-0.229815	-1.63998												B	0.832079	-0.097286	0.158863		H	-1.44277	-2.34148	-2.12143		C	-2.67785	-1.80184	-1.72027
C	0.293536	-0.584004	1.10437												H	0.365608	-0.495778	-1.23569							C	-1.92534	-1.01718	-0.841675		81
C	0.822589	-1.03348	2.32486												C	-0.161765	-0.886312	1.16542		81					C	-0.524289	-1.19796	-0.779314		IprPhCAT-H2-Rot(-)-TS
H	1.90078	-1.04331	2.45598												C	0.402608	-1.42877	2.32785		MesCAT-H2-Rot(-)-TS					C	0.017515	-2.24659	-1.53796		C	-1.87837	-3.07158	-0.370853
C	0.018873	-1.46668	3.36798												H	1.47996	-1.37017	2.45348		C	1.79272	-3.1195	-0.659682		C	-0.742164	-3.03005	-2.3944		C	-1.30487	-1.8267	-0.127892
H	0.46454	-1.79841	4.29899												C	-0.359184	-2.02275	3.32026		C	1.2244	-1.89007	-0.335849		C	-2.10112	-2.78833	-2.5062		C	0.048861	-1.64237	0.21172
C	-1.35815	-1.47973	3.19946												H	0.117716	-2.42141	4.20876		C	-0.162472	-1.64366	-0.3298		N	-2.59078	-0.116632	0.066197		C	0.760509	-2.84862	0.359513
H	-2.00858	-1.81735	3.99873												C	-1.73856	-2.09808	3.16841		C	-0.929959	-2.78888	-0.621228		C	-3.14996	1.1506	-0.491336		C	0.207725	-4.10202	0.149889
C	-1.90226	-1.06677	1.99366												H	-2.35578	-2.54373	3.94055		C	-0.392796	-4.02472	-0.940659		C	-3.3953	2.11655	0.682211		C	-1.11956	-4.22145	-0.23729
H	-2.97649	-1.09028	1.86912												C	-2.31919	-1.61833	2.00649		C	0.984252	-4.19537	-0.979512		C	-4.20646	1.5089	1.81669		N	-2.17945	-0.621574	-0.198284
C	-1.10196	-0.615042	0.939549												H	-3.39183	-1.70044	1.86843		N	2.13327	-0.794554	0.103268		C	-3.51459	0.246025	2.31055		C	-2.57051	-0.118435	-1.61825
N	-1.68391	-0.213147	-0.32104												C	-1.554	-1.0375	0.991306		C	2.69882	-0.944309	1.55123		C	-3.30175	-0.795904	1.19859		C	-3.01604	1.3393	-1.42387
H	0.077484	-0.093122	-1.32472												N	-2.18256	-0.642709	-0.254335		C	3.08627	0.481269	1.97197		C	-2.10582	1.80227	-1.40076		C	-4.09402	1.54279	-0.364784
C	-2.25842	-1.34785	-1.1308												H	-0.368635	-0.421604	-0.939073		C	4.02828	1.18655	0.997275		C	-4.43641	1.00023	-1.33089		C	-3.65992	0.949453	0.973437
C	-3.74981	-1.57973	-0.815837												C	-2.73535	-1.783	-1.09398		C	3.47496	1.18136	-0.426785		C	-2.40599	-1.90989	1.75667		C	-3.30502	-0.542455	0.885351
H	-3.84555	-2.00809	0.187165												C	-4.27013	-1.92259	-1.016		C	3.13322	-0.222456	-0.948624		C	-4.65451	-1.46144	0.86203		C	-1.32181	-0.147423	-2.49339
H	-4.1407	-2.33195	-1.50946												H	-4.5357	-2.33044	-0.033368		C	1.59079	-1.48753	2.45239		B	0.601919	-0.305476	-0.075612		C	-3.63594	-0.964654	-2.31575
C	-4.57355	-0.297849	-0.908056												H	-4.5765	-2.67067	-1.75406		C	3.88182	-1.90807	1.68151		C	1.61942	-0.97646	0.964933		C	-2.72767	-1.04576	2.20737
H	-4.62531	0.043358	-1.94715												C	-5.01766	-0.618838	-1.21481		C	2.4026	-0.130392	-2.28207		C	1.11005	0.992616	-0.849798		C	-4.56309	-1.3737	0.610751
H	-5.60588	-0.49654	-0.605684												H	-4.85737	-0.224437	-2.22371		C	4.40511	-1.04231	-1.18851		H	-4.08669	-0.219388	3.11915		B	0.934347	-0.229863	0.155867
C	-3.98014	0.796195	-0.025887												H	-6.09471	-0.780147	-1.11343		B	-0.975626	-0.307113	0.251575		H	-2.53636	0.516197	2.72534		C	0.276112	1.10951	0.852549
H	-4.52684	1.73429	-0.168874												C	-4.52911	0.360408	-0.165042		C	-0.369602	1.22322	-0.090529		H	-2.42015	2.42542	1.07692		C	2.46329	-0.448165	0.704388
H	-4.11557	0.522273	1.02625												H	-5.04034	1.32344	-0.25923		C	-2.63289	-0.388578	0.172838		H	-3.88026	3.01776	0.294683		H	-4.45423	1.05936	1.71679
C	-2.47994	1.06261	-0.27624												H	-4.78311	-0.031546	0.827723		H	4.19709	1.62736	-1.11632		H	-5.22636	1.28534	1.48572		H	-2.79356	1.50079	1.35474
C	-1.97087	1.98169	0.842642												C	-3.01114	0.630175	-0.215745		H	2.57312	1.80066	-0.472024		H	-4.30067	2.22868	2.63496		H	-2.13516	1.92457	-1.13981
H	-0.925022	2.24829	0.690121												C	-2.69206	1.47038	1.02259		H	2.17203	1.07264	2.07438		H	-1.17983	2.00813	-0.8658		H	-3.34953	1.71729	-2.3942
H	-2.55975	2.90225	0.824088												H	-1.65969	1.802	1.01749		H	3.53943	0.423275	2.96542		H	-1.86739	1.17436	-2.26146		H	-5.04539	1.11189	-0.692142
H	-2.07416	1.5395	1.83361												H	-3.32333	2.36217	0.999337		H	5.02222	0.728604	1.0256		H	-2.49755	2.7516	-1.77503		H	-4.2712	2.61363	-0.240381
C	-2.28089	1.85458	-1.58227												H	-2.89671	0.939441	1.95257		H	4.16131	2.22146	1.32142		H	-4.73355	1.98424	-1.70458		H	-0.502195	0.403596	-2.04289
H	-1.2161	1.92527	-1.81541												C	-2.68124	1.50809	-1.43517		H	0.64643	-0.967989	2.31091		H	-4.26431	0.364501	-2.20109		H	-0.980676	-1.16771	-2.67667
H	-2.79613	1.42674	-2.43922												H	-1.60554	1.6685	-1.50295		H	1.41933	-2.54965	2.26863		H	-5.27789	0.59704	-0.771023		H	-1.56893	0.316283	-3.4509
H	-2.66489	2.86967	-1.45092												H	-3.03441	1.09205	-2.37744		H	1.91108	-1.36285	3.48937		H	-2.32308	-2.75095	1.06575		H	-3.67064	-0.63137	-3.35498
C	-1.47557	-2.63857	-0.846332												H	-3.15514	2.48674	-1.31833		H	3.97715	-2.14002	2.74419		H	-1.39938	-1.55264	1.9645		H	-3.36882	-2.02096	-2.33066
H	-0.416254	-2.51407	-1.08586												C	-2.17505	-3.14572	-0.667602		H	3.70547	-2.85175	1.16733		H	-2.83695	-2.27939	2.69077		H	-4.63693	-0.853505	-1.91179
H	-1.55564	-2.96096	0.191718												H	-1.09151	-3.1595	-0.655607		H	4.83341	-1.49599	1.36069		H	-5.01435	-1.98614	1.75192		H	-2.61144	-2.13022	2.20386
H	-1.8729	-3.43574	-1.47906												H	-2.5268	-3.45445	0.316067		H	2.22184	-1.11702	-2.71101		H	-5.4287	-0.754291	0.570679		H	-1.76858	-0.594215	2.43123
C	-2.11101	-1.09608	-2.64776												H	-2.51222	-3.89104	-1.39241		H	1.45981	0.389427	-2.17757		H	-4.54846	-2.20546	0.072299		H	-3.42375	-0.772473	3.0037
H	-1.10606	-0.76217	-2.90457												C	-2.31516	-1.57668	-2.56221		H	3.02479	0.442221	-2.97343		H	-3.746	-1.64512	-1.77671		H	-5.13057	-1.37941	1.54405
H	-2.29845	-2.03322	-3.17824												H	-1.22782	-1.52974	-2.65146		H	4.86423	-0.630761	-2.08998		H	-2.71654	-3.3765	-3.17766		H	-5.21698	-0.962333	-0.151336
H	-2.81815	-0.368402	-3.03815												H	-2.66181	-2.41844	-3.16801		H	5.14428	-0.970087	-0.39775		H	-0.27112	-3.82195	-2.96586		H	-4.34338	-2.41149	0.371855
C	2.61539	-0.889984	-0.290881												H	-2.72334	-0.669016	-3.00072		H	4.20235	-2.0916	-1.39236		H	1.07738	-2.45869	-1.46181		H	-2.91392	-3.15959	-0.662942
C	3.82524	-0.3259	-0.714032												C	2.31859	-0.732141	-0.093329		H	2.86385	-3.2541	-0.656108		H	-0.941749	0.485283	0.968949		H	-1.56457	-5.1911	-0.426835
C	4.90978	-1.1199	-1.06783												C	3.51411	-0.011592	0.171028		H	1.42583	-5.15109	-1.23584		H	-0.279751	0.710642	1.28818		H	0.820575	-4.98787	0.276727
C	4.80435	-2.50387	-1.0116												C	4.75723	-0.596303	-0.078926		H	-1.05239	-4.85857	-1.15518		C	1.28212	-1.14445	2.31608		H	1.80654	-2.78572	0.63467
C	3.61418	-3.08963	-0.592722												C	4.90083	-1.87421	-0.594868		H	-2.00763	-2.69541	-0.568581		C	2.17307	-1.63817	3.25488		H	-1.52868	0.114288	0.12147
C	2.5393	-2.28937	-0.232685												C	3.73902	-2.58882	-0.836663		H	1.46732	-0.010428	0.202597		C	3.45382	-1.99342	2.85646		H	0.986232	-0.070321	-1.03805
C	1.52852	1.59377	0.05198												C	2.48023	-2.04905	-0.588307		H	-0.739836	-0.436775	1.42294		C	3.80766	-1.8566	1.52517		C	-0.148342	1.05566	2.18951
C	1.64915	2.32839	-1.13215												C	0.716435	1.51112	0.050821		C	-0.00471	2.10822	0.963856		C	2.91819	-1.36011	0.567402		C	-0.692761	2.13208	2.87691
C	1.80464	3.70891	-1.11789												C	0.869894	2.15208	-1.19707		C	0.600822	3.34319	0.711426		C	1.7342	2.09985	-0.239899		C	-0.84884	3.3414	2.21704
C	1.86834	4.38985	0.091851												C	0.789875	3.54067	-1.29687		C	0.834498	3.80942	-0.572685		C	2.22739	3.13132	-1.04345		C	-0.397182	3.45556	0.9094
C	1.77103	3.67983	1.28185												C	0.589391	4.34583	-0.18593		C	0.393115	3.00672	-1.61284		C	2.14549	3.08419	-2.42562		C	0.189762	2.383	0.230112
C	1.59357	2.30193	1.25806												C	0.493402	3.71813	1.04964		C	-0.200384	1.76372	-1.38999		C	1.53815	1.99565	-3.03717		C	3.61319	-0.420365	-0.119881
H	1.48655	1.76741	2.19708												C	0.553181	2.33435	1.18656		C	-3.35233	-0.295178	1.39998		C	1.01951	0.980909	-2.25049		C	4.87718	-0.620899	0.443885
H	1.81847	4.20151	2.23151												H	0.373489	4.32785	1.94138		C	-4.71321	-0.00088	1.4245		H	2.54955	3.89542	-3.02136		C	5.04875	-0.854649	1.80022
H	1.99112	5.46709	0.106275												H	0.903975	4.00509	-2.27287		C	-5.45981	0.147486	0.261996		H	1.45917	1.94334	-4.11731		C	3.93375	-0.891742	2.62286
H	1.87801	4.25393	-2.05274												H	5.65215	-0.021684	0.143303		C	-4.8141	-0.143063	-0.9256		H	0.530991	0.142425	-2.73628		C	2.67807	-0.688172	2.06873
H	1.60704	1.81459	-2.08809												H	3.80872	-3.60209	-1.22287		C	-3.44998	-0.448412	-0.98178		H	2.69572	3.99144	-0.575552		H	6.0436	-1.0059	2.2058
H	3.92056	0.753954	-0.759598												C	3.58351	1.38634	0.749295		H	-5.3888	-0.166473	-1.84964		H	4.80916	-2.14078	1.2185		H	4.03858	-1.07545	3.68736
H	5.83814	-0.658711	-1.38665												H	3.22116	2.14363	0.052784		H	-5.21425	0.088683	2.38576		H	4.17025	-2.3755	3.57512		H	1.82241	-0.734528	2.73454
H	5.64846	-3.12592	-1.28909												H	3.00193	1.48625	1.66433		H	0.507639	3.35546	-2.63644		H	1.86928	-1.73788	4.29098		H	5.75714	-0.595661	-0.188943
H	3.52848	-4.16962	-0.542748												H	4.6193	1.62728	0.995832		H	0.87642	3.97152	1.55481		H	0.299758	-0.843561	2.66163		H	-0.474839	4.41936	0.417941
H	1.62061	-2.75636	0.108408												C	6.25795	-2.45204	-0.894431		C	-0.33622	1.85748	2.4172		C	3.41232	-1.27738	-0.873541		H	-1.28773	4.19654	2.71977
															H	6.57029	-2.19808	-1.91255		H	-1.41738	1.93235	2.55427		C	3.9057	-2.63794	-1.38314		H	-0.995085	2.02341	3.91338
															H	7.01534	-2.0618	-0.210744		H	0.131056	2.61324	3.05338		C	4.48823	-0.201423	-1.05195		H	-0.026829	0.120586	2.72517
															H	6.25263	-3.5414	-0.813061		C	1.5352	5.11743	-0.825802		H	2.57837	-0.984909	-1.51085		C	0.866946	2.66029	-1.10506
															C	1.14403	1.39293	-2.47693		H	1.4022	5.80771	0.010392		H	3.15558	-3.41869	-1.22901		C	2.32631	3.06031	-0.838907
															H	0.241617	0.903924	-2.863		H	1.15717	5.60121	-1.72957		H	4.12977	-2.58206	-2.45226		C	0.175812	3.70326	-1.98634
															H	1.49415	2.07442	-3.2539		C	-0.712036	1.0573	-2.61507		H	4.819	-2.95429	-0.871346		H	0.896056	1.72578	-1.66393
															H	1.90972	0.625083	-2.34041		H	-1.7905	1.20107	-2.68955		H	4.09373	0.787484	-0.810992		H	2.83398	2.30314	-0.237354
															C	0.474917	1.78722	2.59408		H	-0.527916	-0.01444	-2.58111		H	5.35235	-0.394979	-0.408403		H	2.87443	3.17858	-1.77919
															H	-0.45401	1.24208	2.77425		C	-6.91043	0.548079	0.30318		H	4.83709	-0.181051	-2.08852		H	2.36776	4.0094	-0.294376
															H	1.28704	1.09044	2.81105		H	-7.41291	0.135139	1.18206		C	1.85882	2.25764	1.26879		H	-0.882046	3.47264	-2.14315
															H	0.533957	2.60163	3.31883		H	-7.4442	0.204473	-0.586438		C	1.02941	3.44855	1.7637		H	0.241714	4.71071	-1.56498
															C	0.475528	5.84194	-0.310051		C	-2.73948	-0.641623	2.74519		C	3.31803	2.3487	1.72594		H	0.659747	3.73581	-2.96652
															H	-0.574614	6.14824	-0.354314		H	-2.09489	-1.51917	2.6635		H	1.45799	1.36617	1.74601		C	3.5057	-0.229508	-1.62962
															H	0.928839	6.34667	0.546459		H	-3.53555	-0.878073	3.45611		H	-0.015389	3.35226	1.45319		C	3.12791	-1.55241	-2.30719
															H	0.964158	6.2042	-1.21722		C	-3.00914	-1.00513	-2.32318		H	1.05853	3.50904	2.85559		C	4.74939	0.374441	-2.28538
															C	1.30467	-2.94332	-0.868994		H	-1.95453	-1.24689	-2.37156		H	1.40803	4.39455	1.36543		H	2.68851	0.469334	-1.809
															H	0.703642	-3.07674	0.031278		H	-3.2511	-0.333474	-3.15163		H	3.86354	1.44313	1.45024		H	2.18894	-1.94174	-1.90735
															H	0.655552	-2.53556	-1.64948		H	2.61184	4.96587	-0.960754		H	3.83106	3.20818	1.28393		H	3.01361	-1.41972	-3.38859
															H	1.63268	-3.92763	-1.20685		H	-0.255416	1.45688	-3.52432		H	3.3666	2.45221	2.81372		H	3.90626	-2.30405	-2.13725
																				H	-0.039714	0.875006	2.77884							H	5.06736	1.28639	-1.77249
															81					H	-7.01272	1.63752	0.349179		81					H	5.59356	-0.322173	-2.29561
															MesCAT-a-H2-TS					H	-2.14139	0.157857	3.18133		IprPhCAT-b-H2-TS					H	4.53112	0.628689	-3.32705
															C	2.40762	-0.675516	2.35875		H	-3.55628	-1.93736	-2.50288		C	2.6348	-0.512541	2.13165
															C	1.70393	-0.515487	1.16436							C	1.71503	-0.283604	1.10463
															C	0.28391	-0.571379	1.18552							C	0.344382	-0.513401	1.35289
															C	-0.30607	-1.02353	2.37507							C	-0.002686	-1.08606	2.59154
															C	0.411109	-1.23369	3.54479							C	0.928307	-1.33448	3.58998
															C	1.77479	-0.999291	3.55217							C	2.25954	-1.01891	3.36602
															N	2.42283	-0.489943	-0.084493							N	2.20254	0.088613	-0.197833
															C	3.15454	0.739055	-0.505927							C	2.64505	1.51829	-0.38124
															C	3.33684	0.665026	-2.03463							C	4.17488	1.67614	-0.518526
															C	3.92881	-0.648124	-2.53026							C	4.8234	0.682877	-1.46447
															C	3.11992	-1.82849	-2.00345							C	4.49835	-0.710862	-0.960963
															C	2.99996	-1.82245	-0.469946							C	2.98307	-0.99304	-0.912318
															C	2.30002	1.97218	-0.213088							C	1.93921	2.11458	-1.61097
															C	4.51294	0.981606	0.187953							C	2.24177	2.39772	0.806935
															C	2.0525	-2.95114	-0.033405							C	2.46074	-1.16272	-2.35057
															C	4.37226	-2.19241	0.14277							C	2.81841	-2.366	-0.242532
															B	-0.809196	-0.01562	0.148621							B	-0.965267	-0.013697	0.607218
															C	-2.07104	-0.970537	-0.164784							C	-2.17492	-0.99553	0.346908
															C	-1.0103	1.5679	-0.046915							C	-1.28986	1.534	0.620876
															H	3.5733	-2.77349	-2.32002							H	4.91564	-0.825125	0.04709
															H	2.11148	-1.79524	-2.43122							H	4.96975	-1.47903	-1.58219
															H	2.35253	0.803047	-2.49603							H	4.38048	2.70608	-0.826915
															H	3.95651	1.50931	-2.3535							H	4.62685	1.55127	0.473855
															H	4.97552	-0.736037	-2.22074							H	5.90585	0.838078	-1.49307
															H	3.93529	-0.659522	-3.62417							H	4.46105	0.821785	-2.48886
															H	1.31798	1.90716	-0.675656							H	2.21683	1.62673	-2.54497
															H	2.16704	2.12425	0.859302							H	0.859579	2.02379	-1.48157
															H	2.80096	2.85722	-0.613326							H	2.18173	3.17709	-1.70894
															H	4.88942	1.96515	-0.106931							H	2.58305	3.41686	0.607047
															H	4.40101	0.992076	1.27401							H	1.16414	2.43174	0.933995
															H	5.2766	0.252523	-0.071697							H	2.69503	2.07115	1.74371
															H	2.13143	-3.1465	1.0382							H	3.08582	-1.88157	-2.88918
															H	1.00917	-2.73057	-0.239278							H	1.44209	-1.54774	-2.33935
															H	2.32487	-3.86617	-0.56564							H	2.459	-0.235978	-2.9206
															H	4.56505	-3.24938	-0.062659							H	1.77711	-2.59957	-0.037408
															H	5.20669	-1.63145	-0.271621							H	3.20937	-3.12677	-0.923327
															H	4.37625	-2.06942	1.22589							H	3.36628	-2.44544	0.696414
															H	3.48506	-0.583389	2.34542							H	3.68103	-0.304355	1.93472
															H	2.35547	-1.11806	4.4601							H	3.00557	-1.18812	4.13452
															H	-0.099363	-1.56501	4.44207							H	0.612257	-1.76676	4.53263
															H	-1.37607	-1.19639	2.39358							H	-1.0452	-1.32247	2.78321
															H	0.730573	-0.244251	-1.1891							H	0.023262	0.014344	-2.19545
															H	0.084266	-0.112088	-1.57168							H	-0.495439	-0.160245	-2.69923
															C	-2.10011	-2.0607	-1.06432							C	-3.41051	-0.579756	0.876788
															C	-3.22998	-2.87257	-1.15572							C	-4.5398	-1.38227	0.840344
															C	-4.36472	-2.65806	-0.389106							C	-4.46686	-2.62632	0.229603
															C	-4.35607	-1.56237	0.460305							C	-3.26437	-3.05403	-0.311646
															C	-3.25494	-0.715694	0.572838							C	-2.1119	-2.26896	-0.250027
															C	-1.52571	2.06804	-1.26848							C	-2.02858	2.25087	-0.346499
															C	-1.71629	3.43688	-1.45627							C	-2.3353	3.59231	-0.107548
															C	-1.44132	4.36158	-0.463476							C	-1.98816	4.22485	1.07595
															C	-0.968056	3.87315	0.746709							C	-1.30624	3.51784	2.05574
															C	-0.743052	2.5186	0.974801							C	-0.951277	2.20086	1.81264
															H	-0.76364	4.57704	1.54878							H	-2.25599	5.26401	1.23354
															H	-2.10097	3.78539	-2.41077							H	-1.03717	3.99085	2.99334
															H	-5.24107	-1.34777	1.05323							H	-0.393672	1.66416	2.57301
															H	-3.2196	-3.7005	-1.8595							H	-2.8777	4.15455	-0.860694
															C	-1.00412	-2.35636	-2.06002							H	-3.22049	-4.02873	-0.786817
															H	-1.13184	-3.35415	-2.48336							H	-5.34305	-3.26315	0.174099
															H	-0.007374	-2.3021	-1.63728							H	-5.47072	-1.03373	1.27333
															C	-5.55096	-3.58152	-0.466632							H	-3.47971	0.399141	1.33894
															H	-5.45777	-4.39336	0.261935							C	-0.826109	-2.82178	-0.834077
															H	-5.6373	-4.0354	-1.45654							C	-0.967394	-3.18205	-2.3163
															C	-3.42713	0.478439	1.48725							C	-0.341723	-4.02673	-0.019045
															H	-3.49798	1.40581	0.914542							H	-0.070915	-2.03571	-0.760914
															H	-2.60192	0.601902	2.18892							H	-1.34303	-2.33587	-2.89651
															C	-1.62982	5.8382	-0.685236							H	0.002143	-3.47683	-2.72867
															H	-0.671946	6.32187	-0.901718							H	-1.65623	-4.01935	-2.46174
															H	-2.04797	6.32137	0.20125							H	-1.09804	-4.817	-0.005335
															C	-1.86525	1.1929	-2.45318							H	0.571442	-4.4472	-0.449351
															H	-2.45294	0.320662	-2.16966							H	-0.134454	-3.73813	1.01496
															H	-0.961724	0.835584	-2.95975							C	-2.5186	1.63306	-1.64794
															C	-0.24681	2.17628	2.3627							C	-1.90562	2.32071	-2.87377
															H	0.703533	1.64394	2.3572							C	-4.04948	1.64752	-1.73973
															H	-0.950806	1.54656	2.90958							H	-2.20927	0.588256	-1.65908
															H	-6.48166	-3.05124	-0.252055							H	-0.815113	2.32167	-2.83336
															H	-4.34041	0.372296	2.07579							H	-2.2106	1.80514	-3.78945
															H	-1.03836	-1.64122	-2.88956							H	-2.23928	3.35977	-2.95225
															H	-2.29772	6.03216	-1.52711							H	-4.37585	1.14924	-2.65723
															H	-2.43693	1.76023	-3.18937							H	-4.50114	1.12603	-0.894208
															H	-0.112758	3.09172	2.94161							H	-4.43902	2.6699	-1.75902
															81
															MesCAT-b-H2-TS1
															B	0.924398	-0.04663	0.111983
															H	0.430115	-0.600122	-1.48679
															C	-0.01867	-0.985841	1.02792
															C	0.624138	-1.58783	2.12185
															H	1.69401	-1.4403	2.2344
															C	-0.042336	-2.35783	3.05892
															H	0.498422	-2.79416	3.89127
															C	-1.40708	-2.5681	2.91373
															H	-1.95553	-3.16516	3.63393
															C	-2.06385	-2.01627	1.8275
															H	-3.12559	-2.19296	1.70734
															C	-1.40252	-1.23255	0.874557
															N	-2.14264	-0.719314	-0.262245
															H	-0.27324	-0.479062	-1.20422
															C	-2.64299	-1.75761	-1.24422
															C	-4.10938	-2.17476	-1.0045
															H	-4.16498	-2.77714	-0.090668
															H	-4.41342	-2.8327	-1.82527
															C	-5.05687	-0.993707	-0.883119
															H	-5.12268	-0.452773	-1.83283
															H	-6.06941	-1.34198	-0.659114
															C	-4.56219	-0.077445	0.2222
															H	-5.20183	0.807239	0.304412
															H	-4.64133	-0.60464	1.18056
															C	-3.10605	0.408388	0.046582
															C	-2.74065	1.12093	1.35157
															H	-1.76938	1.59707	1.27439
															H	-3.4803	1.90599	1.52799
															H	-2.74947	0.454166	2.21385
															C	-3.03302	1.47905	-1.05737
															H	-1.99201	1.72982	-1.26275
															H	-3.51109	1.17842	-1.98801
															H	-3.53859	2.3874	-0.717658
															C	-1.80048	-3.03538	-1.1846
															H	-0.763266	-2.83469	-1.43593
															H	-1.83122	-3.52177	-0.210082
															H	-2.19114	-3.73912	-1.92369
															C	-2.50681	-1.2314	-2.68883
															H	-1.49843	-0.859676	-2.87613
															H	-2.7	-2.04838	-3.38969
															H	-3.20542	-0.433616	-2.92775
															C	2.4476	-0.526202	-0.166321
															C	3.5625	0.33059	0.054254
															C	4.86283	-0.149448	-0.115751
															C	5.14213	-1.44417	-0.51994
															C	4.06101	-2.27818	-0.755089
															C	2.74799	-1.84948	-0.586331
															C	0.589039	1.51847	0.022949
															C	0.571933	2.22547	-1.19629
															C	0.276417	3.58844	-1.21647
															C	0.035072	4.30711	-0.055397
															C	0.132777	3.62515	1.15115
															C	0.401648	2.26158	1.20937
															H	-0.000499	4.17364	2.07993
															H	0.255777	4.10617	-2.17191
															H	5.69217	0.524677	0.078037
															H	4.24063	-3.2998	-1.07858
															C	3.48849	1.77992	0.489695
															H	2.99893	2.41111	-0.252328
															H	2.94724	1.91122	1.42539
															H	4.49833	2.16501	0.64143
															C	6.55605	-1.91661	-0.725438
															H	6.85367	-1.79955	-1.77244
															H	7.25886	-1.34451	-0.115963
															H	6.6619	-2.97346	-0.469557
															C	0.899916	1.58415	-2.52554
															H	0.036652	1.0587	-2.94753
															H	1.19775	2.34734	-3.24676
															H	1.72189	0.869164	-2.4412
															C	0.535382	1.64591	2.5847
															H	-0.312529	1.00389	2.83231
															H	1.43057	1.02549	2.67215
															H	0.599823	2.42832	3.34351
															C	-0.314654	5.77067	-0.096879
															H	-1.40061	5.90866	-0.082602
															H	0.095477	6.30161	0.765439
															H	0.0668	6.24554	-1.00351
															C	1.68469	-2.85745	-0.934685
															H	0.903326	-2.91361	-0.17993
															H	1.21516	-2.60414	-1.89136
															H	2.11857	-3.85229	-1.04735
															81
															MesCAT-b-H2-TS2
															B	-0.780238	-0.118391	0.169795
															H	-0.191628	-0.457114	-1.10145
															C	0.204714	-0.85781	1.22238
															C	-0.322305	-1.38847	2.40606
															H	-1.39675	-1.34197	2.55794
															C	0.476248	-1.95595	3.3854
															H	0.030224	-2.3468	4.29326
															C	1.85323	-2.01554	3.19994
															H	2.49493	-2.43888	3.96447
															C	2.40022	-1.54873	2.01643
															H	3.47003	-1.61748	1.85318
															C	1.59202	-0.997556	1.02141
															N	2.15405	-0.598633	-0.26117
															H	0.613202	-0.406543	-0.829708
															C	2.74856	-1.74008	-1.09255
															C	4.28735	-1.81715	-1.03329
															H	4.58351	-2.20456	-0.051548
															H	4.60599	-2.56365	-1.76744
															C	4.98628	-0.492033	-1.25873
															H	4.80096	-0.114066	-2.26933
															H	6.06904	-0.615412	-1.16792
															C	4.47556	0.478329	-0.212895
															H	4.95467	1.45633	-0.316998
															H	4.74832	0.103331	0.781176
															C	2.95235	0.708121	-0.254908
															C	2.62288	1.55899	0.972324
															H	1.58202	1.86089	0.975455
															H	3.22741	2.46794	0.923028
															H	2.85684	1.05105	1.908
															C	2.5833	1.54813	-1.48709
															H	1.50681	1.71089	-1.52711
															H	2.90892	1.10877	-2.42809
															H	3.05931	2.52898	-1.4072
															C	2.25208	-3.11527	-0.629722
															H	1.1719	-3.17645	-0.593088
															H	2.6388	-3.39073	0.350314
															H	2.60623	-3.85798	-1.34886
															C	2.30194	-1.56869	-2.55645
															H	1.21437	-1.51756	-2.63443
															H	2.63603	-2.42881	-3.14203
															H	2.71127	-0.677328	-3.02651
															C	-2.25494	-0.795372	-0.079445
															C	-3.47309	-0.118371	0.194844
															C	-4.69851	-0.732216	-0.077346
															C	-4.80405	-2.00285	-0.617977
															C	-3.62009	-2.67794	-0.867595
															C	-2.38048	-2.1057	-0.599121
															C	-0.746257	1.49925	0.064388
															C	-0.938778	2.11021	-1.19369
															C	-0.941047	3.49928	-1.3181
															C	-0.781148	4.33386	-0.222058
															C	-0.638262	3.73388	1.02281
															C	-0.620318	2.35109	1.18348
															H	-0.54568	4.36508	1.90292
															H	-1.08733	3.93948	-2.30113
															H	-5.61037	-0.184537	0.144752
															H	-3.65692	-3.68307	-1.27948
															C	-3.5898	1.26423	0.801682
															H	-3.26822	2.0495	0.115957
															H	-2.99958	1.36817	1.71044
															C	-1.17583	-2.95689	-0.879359
															H	-0.601289	-3.10362	0.036739
															H	-0.517618	-2.49888	-1.62203
															C	-6.14272	-2.63867	-0.882332
															H	-6.91585	-1.88402	-1.04319
															H	-6.45406	-3.25606	-0.033422
															C	-0.498659	1.83413	2.59922
															H	0.449922	1.32211	2.77382
															H	-1.2839	1.1159	2.84312
															C	-1.16977	1.31	-2.45693
															H	-1.90774	0.518703	-2.3068
															H	-0.247433	0.837933	-2.8161
															C	-0.756737	5.83195	-0.372064
															H	0.272625	6.19937	-0.436869
															H	-1.22748	6.32387	0.482539
															H	-1.46339	-3.93857	-1.2599
															H	-6.10787	-3.28455	-1.76306
															H	-4.63068	1.45852	1.06791
															H	-1.27849	6.14933	-1.27767
															H	-1.53048	1.95849	-3.25725
															H	-0.57148	2.65934	3.31051
